# Supplementary material for: An improved second order dynamic stall model for wind turbine airfoils
Source: Copernicus journal article supplement (doi:10.5194/wes-2020-75), 2020-05-05
Supplement: Supplementary file [file wes-2020-75-AC2-supplement.pdf]

## Reviewer 1: Dr. Khiem Truong

Dear Dr. Truong, first of all we would like to thank you for your updated comments and suggestions. The positive attitude towards publishing the paper and the constructive feedback are highly appreciated. All remarks given have been considered in the manuscript. The changed texts are indicated by **red color** in the **marked up** revised paper. The discussion paper has been revised accordingly.

*2.1. Analysis of the various stall models: The authors spent a great length of time in analysis of the existing stall models that does not present a great interest for the manuscript objective. They state in their introduction (lines 45 - 46): "The main purpose of this paper is to document widely used state-of-the-art dynamic stall models in research and industries". I would disagree with such assertion of the above sentence: (1) Is it "one" of the purposes of the paper and not the "main" purpose? (2) the claim about the presentation of the state-of-art dynamic models in research and industries is exaggerated:*

Thank you for your comment. The statement has now been revised as:

"...Therefore, one major key for a model to be used in industrial applications is robustness of the model itself. **One of the purposes of this paper is to document widely used dynamic stall models in research and industries. These include the first order LB model and the second order Snel model.** A very recently improved Snel model according to Adema [1] will also be evaluated. The mathematical formulations of these models..."

*The application of the dynamic models is incomplete*

and

*I suggest that the authors leave out the BL and ONERA – Edlin models, unless if the authors are willing to spend more effort for studying these models. It appears better to center the effort on the second order model, as stated in the abstract.*

Thank you for this important suggestion. We have now removed the assessments of the Leishman-Beddoes and ONERA models. Only the second order models are retained in the revised paper. Consequently, the description of the ONERA model in Section 2.2 is removed as well. However, the description of the Leishman-Beddoes model in Section 2.1 is retained because it becomes the founding basis for the IAG model.

*2.2. Values of constants used in the IAG model: To avoid any confusion about the values indicated in Table 5, it is preferable that the authors state that the values of the critical stall angle are related to airfoils with leading edge grit roughness and Reynolds number of 750k in paragraph "2.6" at the position of line 369, the lines 375-381 in the paragraph "3 Results and Discussion" to be moved to there.*

Thank you for the suggestion. The sentences have been moved to the requested location.

*Value of the Strouhal number  $S$ : It is misleading to call  $kS$  as "Strouhal frequency", while it does not have its value (around "0.1"). I suggest to simply call it a constant with value equal to "0.2"*

Thank you for your this recommendation. We do agree with you in this regard. The terms Strouhal number has been revised as:

"...Variable  $k_s$  **is a constant with a typical value of 0.2...**"

2.3. *Sensitivity of the results against applied time step of the solver: There is no interest in studying the effects of sensitiveness of the integration of models against the step size. The choice of a ODE solver with automatic step variation would do the job better than a ODE solver with fixed time step. It would allow the choice of output at time values requested by the structural code for coupling fluid-structure.*

and

*Line 540: assertion without proof for the BL model.*

Thank you for your comment. The time step size assessment has been removed from the paper.

2.4. *Quality of the IAG model: The authors claim the superiority of their model over the others, but their model errors are not quantified. Following my first review, the authors have included the calculation of the L2-norm error, but only for their own model. I would expect such calculation for the Snel, Adema and IAG models in the cases analyzed in Figures 10, 11 and 12. Regarding these cases, I suggest that the values of pitch angles to be used in computation are to be obtained from a fit of experimental values and not from experimental values provided by experimenters. This could lead to a lower L2-norm error and a better graphical visualization of the correlation between experiments and predictions.*

Thank you for the remarks and suggestions. We have now added a section assessing the  $L_2$ -norm of errors for cases involving different airfoils also for the other models. The angle of attack was obtained by interpolating the actual measured angle using a third order spline interpolation, the same approach adopted throughout the paper for the IAG model. This is presented as:

”....Holierhoek et al . [2] introduced a way for quantifying the absolute error between the experimental data and modeled lift coefficient. The general formulation reads:

$$L_2^\phi = \sqrt{\frac{1}{N} \sum_i^N (\phi_i^{mod} - \phi_i^{exp})^2} \quad (1)$$

with  $\phi$  being the variable of interest,  $i$  is the current sample and  $N$  is the total number of sample. In their paper, however, only lift was considered. Here all three force components will be shown for four different airfoils. Figure 1 displays the quantified error for two different flow category, attached and deep stall. The timeseries of the angle of attack was obtained from the measured data by applying a third-order cubic-spline interpolation in between each available point. One can see that generally the attached flow case is predicted very well, while the error increases as the flow condition becomes more complicated. Interestingly, especially for lift, it seems that the error reduces with increasing airfoil thickness. The reason for the larger error obtained for the thinner airfoil is attributed to the complex characteristics of the leading edge stall, causing severe load variations especially with increasing angle of attack. Thus, it makes the prediction more challenging. Furthermore, the quantification of the error was also performed on two other dynamic stall models, Snel and Adema-Snel. The same approach for the angle of attack signal was applied. One can see that the IAG model shows its improved prediction especially for the deep stall case for all three force components....”

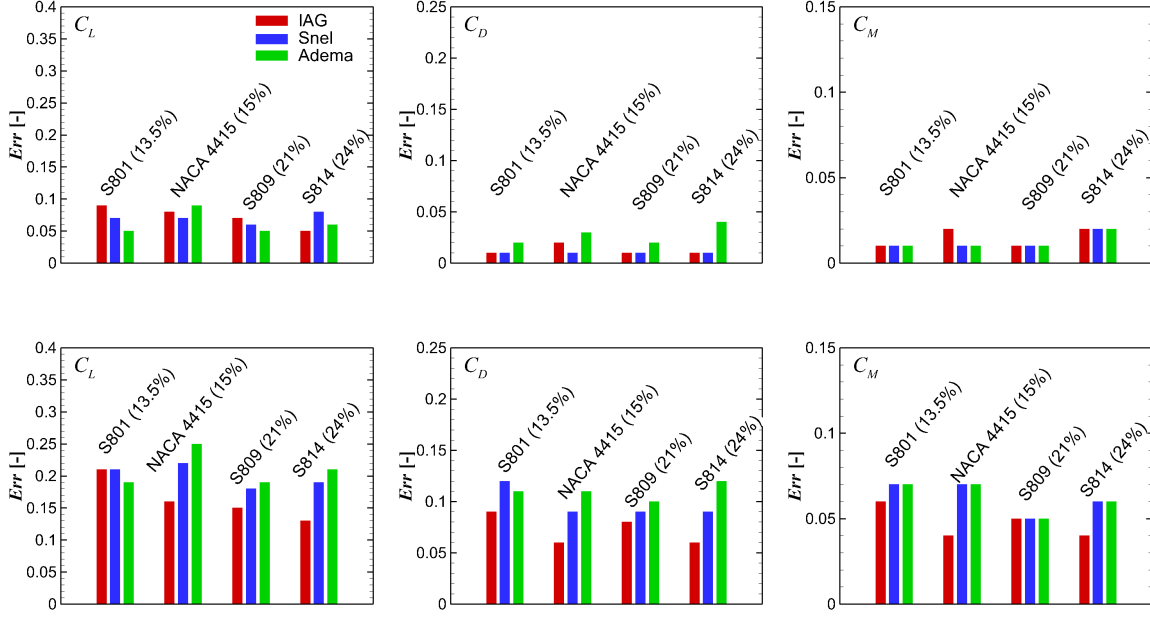

Figure 1: Quantified  $L_2$  norm of error with respect to the measurement data for four airfoils. Top: attached flow case (  $k = 0.073$ ,  $\bar{\alpha} = 8^\circ$ ,  $\Delta\alpha = 5.5^\circ$ ), bottom: deep stall case (  $k = 0.073$ ,  $\bar{\alpha} = 20^\circ$ ,  $\Delta\alpha = 10^\circ$ )

*I would suggest studies of  $k = 0.03$ ,  $0.05$  and  $0.10$  instead of high  $k$  ( $0.015$  and  $0.21$ ).*

and

*Line 549: "Increasing  $k$  above  $0.1$  reduces the viscous effects and vortex shedding influence". It is well known that the increase of  $k$  leads to a more important variation of the pitching moment.*

Thank you very much for this very important remark. We think there is some misunderstanding concerning our previous statement. To avoid any confusion, we rewrite the analyses of the reduced frequency in the revised paper. Indeed we agree with you that the vibrations become more violent with increasing  $k$ , which can be dangerous for the airfoil structure. The analyses are now rewritten as:

"....The gradient of the lift polar in the upstroke and downstroke phase is also increasing as well. These characteristics are present in both experimental data and predictions delivered by the IAG model. A similar behavior is also displayed in drag and pitching moment in Figures 16 and 17, respectively. It is obvious that stall occurs much earlier for a smaller  $k$  value. **One can see that the maximum amplitude of all three force components increases with increasing  $k$ . This can be dangerous for the structural stability, since the amplitude determines the fatigue loads.**

To better investigate the **effects of  $k$** , the IAG model is used to reconstruct the dynamic polar data at various  $k$  by applying an idealized sinusoidal motion as presented in Figure 2. Only the last DS cycle is shown for clarity of the observation. **While the maximum amplitude of all three force components at low frequency domains increases with increasing  $k$  (blue and green markers), the amplitudes for all three forces at high frequency domains show different characteristics as shown in the Fourier transformation in Figure 3, albeit with much smaller values. The higher harmonic amplitudes are attributed to flow separation effects, while for low frequency domains are driven by the pitching motion (i.e., external unsteadiness or inflow)....."**

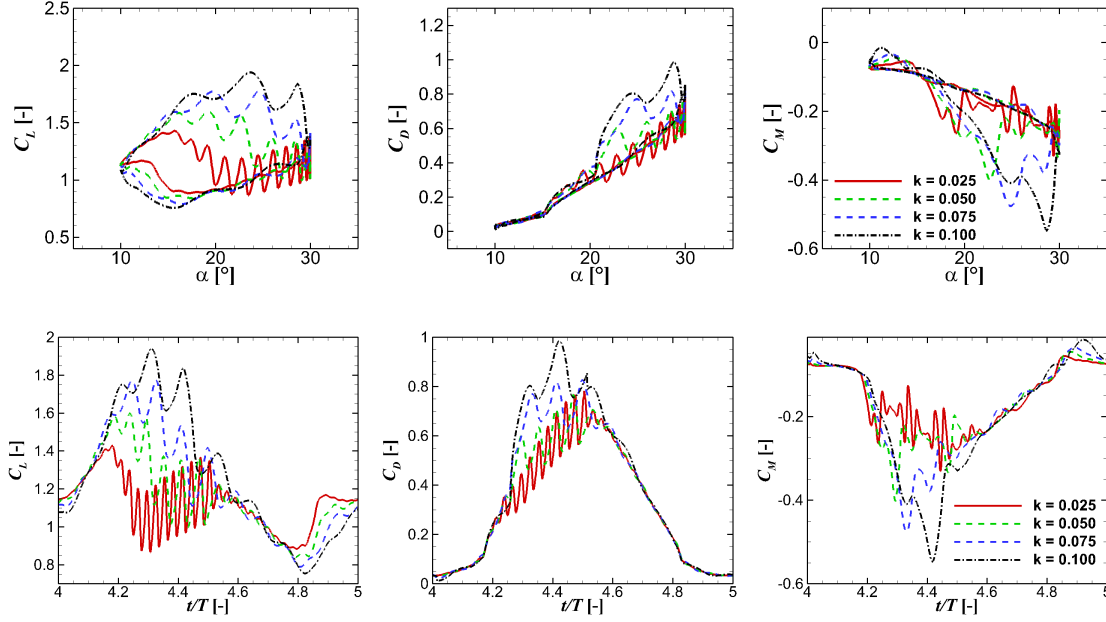

Figure 2: Effects of  $k$  on the aerodynamic response by the IAG model for  $\Delta t = T/1440$ . S801 airfoil,  $\bar{\alpha} = 20^\circ$ ,  $\Delta\alpha = 10^\circ$ . Top: polar, bottom: timeseries.

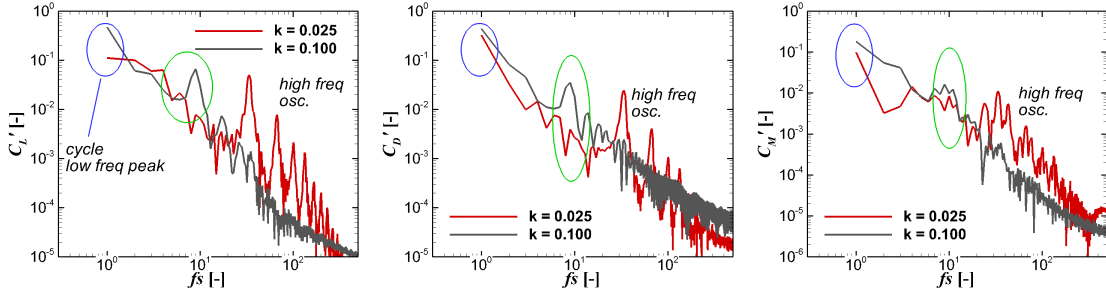

Figure 3: Fourier transformation of the predicted forces presented in Figure 2.  $f_s = f/f_0$  with  $f_0$  being the pitching frequency.

Line 542-543: “Despite that, only the Adema model and the present IAG model are able to demonstrate the higher harmonic effects”. The ONERA – Hopf bifurcation does it too!

Thank you for the comment. This sentence applies only to the models investigated in the present paper. To avoid misunderstanding, it is now rephrased as:

”The general characteristics of the polar data can be predicted by all investigated dynamic stall models. Despite that, only the Adema model and the present IAG model are able to demonstrate the higher harmonic effects among the three investigated models.”

Line 546: typo “comparsion”.

Corrected.

Line 548: “without changing the constants” Be more precise: by changing only the values of  $\alpha_{CRIT}$ .

Corrected as:

”The dynamic forces reconstructed by the IAG model are in a sound agreement with the experimental data under various flow conditions by variation of  $\bar{\alpha}$ ,  $k$ ,  $\Delta\alpha$  and for four different airfoils by changing only the values of the critical angle of attack.

*For references: delete line 623, the reference in line 622 is the same*

Done.

The above discussions sum up the corrections performed in the updated paper. We hope that the revisions done satisfy the reviewer’s requests.

## References

- [1] Adema N., Kloosterman M. and Schepers G.: Development of a Second Order Dynamic Stall Model. *Wind Energy Science Discussions* 2019, 1–18, 2019. doi:10.5194/wes-2019-87.
- [2] Holierhoek J., De Vaal J., Van Zuijlen A. and Bijl H.: Comparing different dynamic stall models. *Wind Energy* 16(1), 139–158, 2013.

# An improved second order dynamic stall model for wind turbine airfoils

Galih Bangga<sup>1</sup>, Thorsten Lutz<sup>1</sup>, and Matthias Arnold<sup>2</sup>

<sup>1</sup>Institute of Aerodynamics and Gas Dynamics (IAG), University of Stuttgart, 70569 Stuttgart, Germany

<sup>2</sup>Wobben Research and Development GmbH, 26607 Aurich, Germany

**Correspondence:** Galih Bangga (bangga@iag.uni-stuttgart.de)

**Abstract.** Robust and accurate dynamic stall modeling remains one of the most difficult tasks in wind turbine load calculations despite its long research effort in the past. In the present paper, a new second order dynamic stall model is developed with the main aim to model the higher harmonics of the vortex shedding while retaining its robustness for various flow conditions and airfoils. Comprehensive investigations and tests are performed at various flow conditions. The occurring physical characteristics for each case are discussed and evaluated in the present studies. The improved model is also tested on four different airfoils with different relative thicknesses. The validation against measurement data demonstrates that the improved model is able to reproduce the dynamic polar accurately without airfoil specific parameter calibration for each investigated flow condition and airfoil. This can deliver further benefit to industrial applications where experimental/reference data for calibrating the model is not always available.

## 1 Introduction

An accurate prediction of wind turbine blade loads is influenced by many parameters including 3D and unsteady effects. The first mainly occurs in the root and tip areas of the blade due to radial flow and induced velocity influences, respectively (Bangga, 2018). The latter can occur due to variation of the inflow conditions caused by yaw misalignment, wind turbulence, shear & gusts, tower shadow and aeroelastic effects of the blade. The above mentioned phenomena may result in dynamic stall (DS). Experimental studies (Martin et al., 1974; Carr et al., 1977; McAlister et al., 1978) showed that the aerodynamic forces can differ significantly in comparison to the static condition. DS is often initiated by the generation of a leading edge vortex (LEV), which increases positive circulation effect on the airfoil suction side causing delayed stall. This intense leading edge vortex is convected downstream along the airfoil towards the trailing edge. At the same time, the lift force increases significantly and the pitching moment becomes more negative compared to the static values. A significant drag increase is observed at large angles of attack. An example is shown in Figure 1. Afterwards, a trailing edge vortex (TEV) with opposite rotational direction than LEV is formed, which pushes the leading edge vortex towards the wake area. This onset may result in a significant drop of the lift coefficient ( $C_L$ ) and can be dangerous for the blade structure itself.

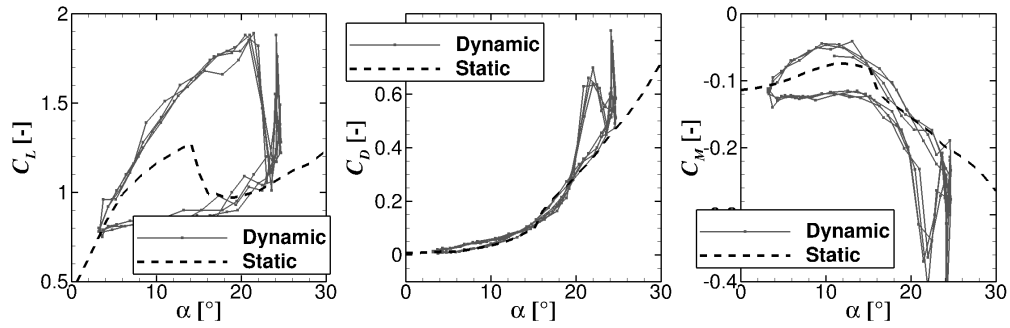

**Figure 1.** Typical dynamic stall behavior of S801 airfoil. Data obtained from (Ramsay et al., 1996).

To model the behavior of the airfoil under these situations, semi-empirical models can be used. The models are known to produce reasonable results with very small computational effort. Leishman & Beddoes (LB) (Leishman and Beddoes, 1989) have developed a model for dynamic stall combining the flow delay effects of attached flow with an approximate representation of the development and effect of separation (Larsen et al., 2007). This model was developed for helicopter applications and therefore includes a fairly elaborate representation of the nonstationary attached flow depending on the Mach number and a rather complex structure of the equations representing the time delays (Larsen et al., 2007). Hansen et al. (Hansen et al., 2004) simplified the model for wind turbine applications by removing the consideration of compressibility effects and the leading edge separation. The latter was argued because the relative thickness of wind turbine airfoil is typically no less than 15%. This model was called Risø model in (Larsen et al., 2007). Examples of the other models are given by Øye (Øye, 1991), Tran & Petot (ONERA model) (Tran and Petot, 1980) and Tarzanin (Boeing-Vertol model) (Tarzanin, 1972). To better model the vortex shedding characteristics at large angles of attack, second order dynamic stall models were introduced. An example of this model was given by Snel (Snel, 1997) which makes use of the difference between the inviscid to the viscous static polar data as a main forcing term for the dynamic polar reconstruction, in contrast to the LB model that uses the changes of the angle of attack over the time. An improved version of the Snel model was proposed recently by Adema (Adema et al., 2019) to cover for the increased shedding effects in the downstroke phase. All above mentioned models employ the static polar data and dynamic flow parameters as the input needed for the dynamic polar reconstruction. Then, the models compute the dynamic force difference required for the reconstruction process.

Although many attempts have been dedicated for dynamic stall modeling (Gupta and Leishman, 2006; Larsen et al., 2007; Adema et al., 2019; Elgammi and Sant, 2016; Wang and Zhao, 2015; Sheng et al., 2006; Galbraith, 2007; Sheng et al., 2008), engineering calculations in industry are still relying on the very basic classical dynamic stall models such as the Leishman-Beddoes and Snel models. The reason is the simplicity to tune in the models for different airfoils and for different flow conditions. Therefore, one major key for a model to be used in industrial applications is robustness of the model itself. One of the purposes of this paper is to document widely used dynamic stall models in research and industries. These include the first order LB model and the second order Snel model. A very recently improved Snel model according to Adema (Adema et al.,

2019) will also be evaluated. The mathematical formulations of these models will be presented in this report. Weaknesses of existing dynamic stall modeling shall be identified, and possible corrections to those limitations will be described. Finally, a new second order dynamic stall modeling will be proposed that is able to model not only the second order lift and drag forces, but also the pitching moment along with calculation examples in comparison to experimental data for different airfoils and flow conditions.

The paper is organized as following. Section 2 describes the mathematical formulation of four dynamic stall models and the new model developed in this work. Then, in Section 3 assessments are carried out on the performance of each model in comparison with measurement data. The new model is further tested at various flow conditions, and to examine its robustness on four different airfoils without further calibrating the constants. Finally, all results will be concluded in Section 4.

## 2 Mathematical Formulations

In this section the mathematical formulations of each model are described in detail. The reasons are manly to provide information on how each model was employed and to gain deeper insights for further developing the new model. Note that each existing model was developed by different authors, thus different symbols and formulation methods were adopted in those publications (Beddoes, 1982; Leishman, 1988; Leishman and Beddoes, 1989; Snel, 1997; Adema et al., 2019). In this paper, all models are described in a consistent way for clarity and for easier interpretation/implementation process.

### 2.1 Leishman-Beddoes model

The original Leishman-Beddoes model is composed by three main contributions representing various flow regimes: (1) unsteady attached flow, (2) unsteady separated flow and (3) dynamic stall. The present section will elaborate the mathematical description and its physical interpretation of each module. Figure 2 illustrates several main parameters needed for modeling the dynamic stall characteristics.

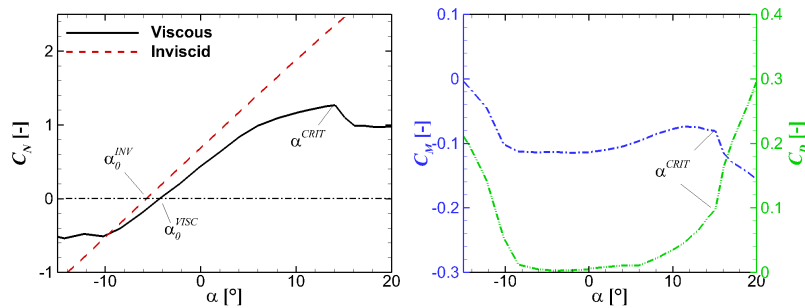

**Figure 2.** Illustration of main aerodynamic parameters needed for modeling the dynamic stall characteristics.



### 2.1.1 Unsteady attached flow

In this module, the unsteady aerodynamic response of the loads is represented by the time delay effects. The indicial formulas were constructed based on the work of Beddoes (Beddoes, 1982), and have been refined by Leishman (Leishman, 1988). The loads are assumed to originate from two main sources; one for the initial noncirculatory loading from the piston theory and another for the circulatory loading which builds up quickly to the steady state value (Leishman and Beddoes, 1989). In the formulation, the relative distance traveled by the airfoil in terms of semi-chords is represented by  $s = 2Vt/c$  that can be used also to describe the nondimensional time. Note that  $V$ ,  $t$  and  $c$  are freestream wind speed, time and chord length, respectively. For a continuously changing angle of attack  $\alpha_n$ , the effective angle of attack ( $\alpha_{e_n}$ ) can be represented as:

$$\alpha_{e_n} = \alpha_n - X_n - Y_n \quad (1)$$

where  $n$  is the current sample time. The last two terms describe the deficiency functions that are given by:

$$X_n = X_{n-1} \exp(-b_1 \beta^2 \Delta s) + A_1 \Delta \alpha_n \exp(-b_1 \beta^2 \Delta s / 2) \quad (2)$$

$$Y_n = Y_{n-1} \exp(-b_2 \beta^2 \Delta s) + A_2 \Delta \alpha_n \exp(-b_2 \beta^2 \Delta s / 2) \quad (3)$$

where

$$\Delta \alpha_n = \alpha_{n+1} - \alpha_n \quad (4)$$

$$\Delta s = s_n - s_{n-1}. \quad (5)$$

In these equations,  $b_1$ ,  $b_2$ ,  $A_1$  and  $A_2$  are constants. The variable  $\beta$  represents the compressibility effects and is formulated as  $\beta = \sqrt{1 - M^2}$ . Because information about the previous cycle is needed in the formulations, initializations are required. The solution needs to develop for a certain time until convergence of the resulting unsteady loads is obtained.

The circulatory normal force due to an accumulating series of step inputs in angle of attack can be obtained using

$$C_{N_n}^C = \frac{dC_N}{d\alpha} (\alpha_{e_n} - \alpha_0^{INV}) \quad (6)$$

The variable  $\alpha_0^{INV}$  is the angle of attack for zero inviscid normal force. The original formulation of the model disregarded the use of  $\alpha_0^{INV}$ . However, this term is important when the airfoil has a finite camber. This has been pointed out as well by Hansen et al. (Hansen et al., 2004).

The noncirculatory (impulsive) normal force is obtained by

$$C_{N_n}^I = \frac{4K_\alpha T_I}{M} \left( \frac{\Delta \alpha_n}{\Delta t} - D_n \right). \quad (7)$$

where  $T_I$  is given by  $T_I = Mc/V$ . The deficiency function  $D_n$  is given by

$$D_n = D_{n-1} \exp\left(\frac{-\Delta t}{K_\alpha T_I}\right) + \left(\frac{\Delta \alpha_n - \Delta \alpha_{n-1}}{\Delta t}\right) \exp\left(\frac{-\Delta t}{2K_\alpha T_I}\right), \quad (8)$$

and  $\Delta t = t_n - t_{n-1}$ .

The total normal force coefficient under attached flow conditions is given by the sum of circulatory and noncirculatory components as

$$C_{N_n}^P = C_{N_n}^C + C_{N_n}^I. \quad (9)$$

### 2.1.2 Unsteady separated flow

100 Leishman & Beddoes (Leishman and Beddoes, 1989) stated that the onset of leading edge separation is the most important aspect in dynamic stall modeling. The condition at when leading edge stall occurs, is controlled by a critical leading edge pressure coefficient that is linked into the formulation by defining a lagged normal force coefficient  $C_{N_n}^{P1}$  as:

$$C_{N_n}^{P1} = C_{N_n}^P - D_{p_n} \quad (10)$$

where  $D_{p_n}$  is given by

$$105 \quad D_{p_n} = D_{p_{n-1}} \exp\left(-\frac{\Delta s}{T_p}\right) + \left(C_{N_n}^P - C_{N_{n-1}}^P\right) \exp\left(-\frac{\Delta s}{2T_p}\right). \quad (11)$$

It has been investigated by Leishman & Beddoes (Leishman and Beddoes, 1989) that the calibration time constant  $T_p$  is largely independent of the airfoil shape. The substitute value of the effective angle of attack incorporating the leading edge pressure lag response may be obtained using

$$\alpha_{f_n} = \alpha_0^{INV} + \left(\frac{C_{N_n}^{P1}}{dC_N/d\alpha}\right) \quad (12)$$

110 In most of airfoil shapes, the progressive trailing edge separation causes loss of circulation and introduces nonlinear effects on the lift, drag and pitching moment, especially on cambered airfoils. This is even more important for wind turbine airfoils because the relative thickness is large. To derive a correlation between the normal force coefficient with the separation location ( $f_n$ ), the relation based on the flat plate from Kirchhoff/Helmholtz can be used, that reads:

$$C_{N_n}^{VISC} = \frac{dC_N}{d\alpha} \left(\frac{1 + \sqrt{f_n}}{2}\right)^2 (\alpha_n - \alpha_0^{VISC}). \quad (13)$$

115 The location of the separation point is usually obtained by a curve-fitting procedure in literature. For example, Leishman & Beddoes (Leishman and Beddoes, 1989) proposed the following correlation

$$f_n = \begin{cases} 1 - 0.3 \exp\left(\frac{\alpha_n - \alpha_1}{S_1}\right); & \alpha_{f_n} \leq \alpha_1 \\ 0.04 + 0.66 \exp\left(\frac{\alpha_1 - \alpha_n}{S_2}\right); & \alpha_{f_n} > \alpha_1 \end{cases} \quad (14)$$

The coefficients  $S_1$  and  $S_2$  define the static stall characteristic while  $\alpha_1$  defines the static stall angle. The derivation was based on the NACA 0012, HH-02 and SC-1095 airfoils that have a single break point of the static lift force coefficient. Gupta &

120 Leishman (Gupta and Leishman, 2006) proposed the formulation for the S809 airfoil as:

$$f_n = \begin{cases} c_1 + a_1 \exp(S_1 \alpha_n); & \alpha_{f_n} \leq \alpha_1 \\ c_2 + a_2 \exp(S_2 \alpha_n); & \alpha_1 < \alpha_{f_n} < \alpha_2 \\ c_3 + a_3 \exp(S_3 \alpha_n); & \alpha_{f_n} \geq \alpha_2 \end{cases} \quad (15)$$

that has two break points ( $\alpha_1$  and  $\alpha_2$ ) of the static lift force coefficient, where  $c_1, c_2, c_3, a_1, a_2$  and  $a_3$  are constants.

The additional effects of the unsteady boundary layer response may be represented by application of a first-order lag to the value of  $f_n$  to produce the final value for the unsteady trailing edge separation point  $f_{2_n}$  (Leishman and Beddoes, 1989). This can be represented as

$$f_{2_n} = f_n - D_{f_n} \quad (16)$$

where  $D_{f_n}$  is given by

$$D_{f_n} = D_{f_{n-1}} \exp\left(-\frac{\Delta s}{T_f}\right) + (f_n - f_{n-1}) \exp\left(-\frac{\Delta s}{2T_f}\right), \quad (17)$$

and  $T_f$  is a constant. Then, the unsteady viscous normal force coefficient for each sample time can be obtained using

$$C_{N_n}^f = \frac{dC_N}{d\alpha} \left( \frac{1 + \sqrt{f_{2_n}}}{2} \right)^2 (\alpha_{e_n} - \alpha_0^{VISC}) + C_{N_n}^I \quad (18)$$

The tangential component of the force can be obtained by (Leishman and Beddoes, 1989):

$$C_{T_n}^f = -\eta \frac{dC_N}{d\alpha} \alpha_{e_n}^2 \sqrt{f_{2_n}} \quad (19)$$

note that positive  $C_{T_n}^f$  is defined in the direction of the trailing edge while  $\eta$  is a constant.

According to Leishman & Beddoes (Leishman and Beddoes, 1989) and Gupta & Leishman (Gupta and Leishman, 2006), a general expression for the pitching moment behavior cannot be obtained from Kirchhoff theory, and an alternative empirical relation must be formulated. Gupta & Leishman (Gupta and Leishman, 2006) proposed the following formulation for the S809 airfoil

$$C_M^f = \begin{cases} C_{M_0} + (K_0 + K_1(1 - f_{2_n}) + K_2 \sin(\pi f_{2_n}^m)); & \alpha_n \leq \alpha_2 \\ C_{M_0} + (K_0 + K_3 \exp(K_4 f_{2_n}^m)); & \alpha_n > \alpha_2 \end{cases} \quad (20)$$

where  $C_{M_0}$  defines the moment coefficient at zero normal force and  $K_0$  is the mean offset of the aerodynamic center from the quarter chord position,  $K_1, K_2, K_3, K_4$  and  $m$  are constants.

### 2.1.3 Dynamic stall

The third part of the model describes the post-stall characteristics where the vortical disturbances near the leading edge become stronger. The effect of vortex shedding is given by defining the vortex lift as the difference between the linearized value of the unsteady circulatory normal force and the unsteady nonlinear normal force obtained from the Kirchhoff approximation, that reads

$$C_{V_n} = C_{N_n}^C (1 - K_n) \quad (21)$$

where  $K_n$  is given by

$$K_n = \frac{1}{4} \left( 1 + \sqrt{f_{2_n}} \right)^2. \quad (22)$$

The normal force is allowed to decay, but it is updated with a new increment in the normal force based on prior forcing  
150 condition, that can be defined as

$$C_{N_n}^V = \begin{cases} C_{N_{n-1}}^V \exp\left(-\frac{\Delta s}{T_v}\right) + (C_{V_n} - C_{V_{n-1}}) \exp\left(-\frac{\Delta s}{2T_v}\right); & \text{if } 0 < \tau_{v_n} < T_{vl} \\ C_{N_{n-1}}^V \exp\left(-\frac{\Delta s}{T_v}\right); & \text{otherwise} \end{cases} \quad (23)$$

where  $T_v$  and  $T_{vl}$  are the vortex decay and center of pressure travel time constants, respectively. The nondimensional vortex time is given by (dos Santos Pereira, 2010; Elgammi and Sant, 2016):

$$\tau_{v_n} = \begin{cases} \tau_{v_{n-1}} + 0.45 \frac{\Delta t}{c} V; & \text{if } C_{N_n}^{P1} > C_N^{CRIT} \\ 0; & \text{if } C_{N_n}^{P1} < C_N^{CRIT} \text{ and } \Delta\alpha_n > 0 \end{cases} \quad (24)$$

155 with  $C_N^{CRIT}$  being the inviscid critical static normal force, usually indicated by the break of the (viscous) moment polar at the critical angle of attack  $\alpha_n^{CRIT}$ . This can be formulated as:

$$C_N^{CRIT} = \frac{dC_N}{d\alpha}(\alpha_n^{CRIT} - \alpha_0^{INV}). \quad (25)$$

The idealized variation of the center of pressure with the convection of the leading edge vortex can be modeled by

$$C_{P_{v_n}} = K_v \left(1 - \cos\left(\frac{\pi\tau_v}{T_{vl}}\right)\right) \quad (26)$$

160 The dynamic moment coefficient can be formulated as

$$C_{M_n}^V = -C_{P_{v_n}} C_{N_n}^V \quad (27)$$

Therefore, the total dynamic loading on the airfoil from all modules can be written as

$$C_{N_n}^D = C_{N_n}^f + C_{N_n}^V \quad (28)$$

$$C_{T_n}^D = C_{T_n}^f \quad (29)$$

$$165 \quad C_{M_n}^D = C_{M_n}^f + C_{M_n}^V \quad (30)$$

and by converting these forces into lift and drag, one obtains:

$$C_{L_n}^D = C_{N_n}^D \cos \alpha_n - C_{T_n}^D \sin \alpha_n \quad (31)$$

$$C_{D_n}^D = C_{N_n}^D \sin \alpha_n + C_{T_n}^D \cos \alpha_n \quad (32)$$

#### 2.1.4 Note to present implementation

170 In Equations (14) and (15), a curve-fitting procedure is usually adopted in literature. In this sense, the parameters or even the formulation need to be adjusted when the airfoil is different. Therefore, in the present implementation, the separation point is

derived directly from the static polar data using inversion of Equation (13) as.

$$f_n = \left( 2 \sqrt{\frac{C_{N_n}^{VISC}}{\frac{dC_N}{d\alpha}(\alpha_{f_n} - \alpha_0^{VISC})}} - 1.0 \right)^2 \quad (33)$$

The same approach was used for example by Hansen et al. (Hansen et al., 2004). This way, the user can avoid dealing with  
 175 curve fitting adjustment (which requires changes on the constants for different airfoils and flow conditions) as long as the static polar data is available.

In the original formulation, the pitching moment is obtained also by a curve fitting procedure in Equation (20). Again, this kind of approach is not straightforward as the user needs to perform curve fitting of the polar data. In the present implementation, the moment coefficient is easily obtained from the static viscous polar data by interpolating the value at the effective  
 180 angle of attack incorporating the leading edge pressure time lag  $\alpha_{f_n}$ , that reads

$$C_{M_n}^f = C_M^{VISC}(\alpha_{f_n}). \quad (34)$$

In this sense, the moment coefficient can be reconstructed easily without the need to adjust the parameters in advance, minimizing the user error.

Furthermore, to avoid discontinuity in the downstroke phase for Equation (24), an additional condition is applied in the  
 185 present implementation as:

$$\tau_{v_n} = \begin{cases} \tau_{v_{n-1}} + 0.45 \frac{\Delta t}{c} V; & \text{if } C_{N_n}^{P1} > C_N^{CRIT} \\ 0; & \text{if } C_{N_n}^{P1} < C_N^{CRIT} \text{ and } \Delta\alpha_n \geq 0 \\ \tau_{v_{n-1}}; & \text{otherwise} \end{cases} \quad (35)$$

## 2.2 Snel 2nd order model

190 The history of the Snel's second order model (Snel, 1997) dates back to 1993 based on Truong's observation on dynamic lift coefficient characteristics (Truong, 1993). Truong proposed that the difference between the static and dynamic lift can be divided into two terms: the forcing frequency response and the higher frequency dynamics of a self-excited nature. The total dynamic response of the airfoil is formulated as:

$$C_{L_n}^D = C_{L_n}^{VISC} + \Delta C_{L_n}^{D1} + \Delta C_{L_n}^{D2} \quad (36)$$

$$195 \quad C_{D_n}^D = C_{D_n}^{VISC} + \cancel{\Delta C_{D_n}^{D1}} + \cancel{\Delta C_{D_n}^{D2}} \quad (37)$$

$$C_{M_n}^D = C_{M_n}^{VISC} + \cancel{\Delta C_{M_n}^{D1}} + \cancel{\Delta C_{M_n}^{D2}} \quad (38)$$

with  $^{D1}$  and  $^{D2}$  being the first and second order corrections, respectively. The first correction is modeled using an ordinary differential equation (ODE) by applying a spring-damping like function as:

$$\tau \Delta \dot{C}_{L_n}^{D1} + K f_{10_n} \Delta C_{L_n}^{D1} = F_{1_n} \quad (39)$$

200 The frequency of the first-order corrected lift follows the frequency of the forcing term  $F_1$ . This term is based on the time derivative of the difference between the steady inviscid  $C_{L_n}^{INV}$  and viscous lift coefficient  $C_{L_n}^{VISC}$  of an airfoil ( $\Delta C_{L_n}^{INV}$ ) as:

$$F_{1_n} = \tau \Delta \dot{C}_{L_n}^{INV} \quad (40)$$

$$\Delta C_{L_n}^{INV} = C_{L_n}^{INV} - C_{L_n}^{VISC} = \frac{dC_L}{d\alpha} (\alpha_n - \alpha_0^{INV}) - C_{L_n}^{VISC} \quad (41)$$

with  $n$  and  $dC_L/d\alpha$  are the current sample time and inviscid lift gradient, respectively. The time constant  $\tau$  in the above  
205 equation represents the time required for the flow to travel half a chord distance as:

$$\tau = \frac{c}{2V} \quad (42)$$

The "stiffness" coefficient of the first order term  $K f_{10_n}$  can be expressed as:

$$K f_{10_n} = \begin{cases} \frac{1 + 0.5 \Delta C_{L_n}^{INV}}{8(1 + 60\tau \dot{\alpha}_n)}; & \text{if } \dot{\alpha}_n C_{L_n}^{INV} \leq 0 \\ \frac{1 + 0.5 \Delta C_{L_n}^{INV}}{8(1 + 80\tau \dot{\alpha}_n)}; & \text{if } \dot{\alpha}_n C_{L_n}^{INV} > 0. \end{cases} \quad (43)$$

As shown in (Faber, 2018), the above equation becomes numerically unstable if  $\dot{\alpha}_n$  is large (increasing reduced frequency  
210 above 0.1) for  $\dot{\alpha}_n C_{L_n}^{INV} \leq 0$ . The reason is that the denominator goes to zero and then negative, causing numerical integration instability. Thus, based on pure intuition the denominator value was set to a minimum of 2.0 in Ref. (Faber, 2018). In the present implementation, a similar approach is adopted but the limit differs. Instead, the minimum denominator value is limited to  $1 \times 10^{-5}$ , because it yields more physical results for several cases tested by the authors.

To incorporate the higher order frequency dynamics, a second order ODE is used to describe the second order correction  
215 term. The general form may be written as:

$$\tau^2 \Delta \ddot{C}_{L_n}^{D2} + K f_{21_n} \Delta \dot{C}_{L_n}^{D2} + K f_{20_n} \Delta C_{L_n}^{D2} = F_{2_n} \quad (44)$$

similar to the first order correction, the frequency of the higher order dynamics is determined by the forcing term  $F_{2_n}$ , defined as:

$$F_{2_n} = 0.1 k_s (-0.15 \Delta C_{L_n}^{INV} + 0.05 \Delta \dot{C}_{L_n}^{INV}). \quad (45)$$

220 It is noted that the value 0.1 as a constant was chosen according to Ref. (Adema et al., 2019). This is not a fixed value and can be adjusted based on the evaluated cases as seen in literature (Adema et al., 2019; Snel, 1997; Holierhoek et al., 2013; Faber, 2018; Khan, 2018). Variable  $k_s$  is a constant with a typical value of 0.2. The spring coefficient is given by

$$K f_{20_n} = k_s^2 [1 + 3(\Delta C_{L_n}^{D2})^2] [1 + 3\dot{\alpha}_n^2] \quad (46)$$

and the damping coefficient as

$$225 \quad K f_{21n} = \begin{cases} 60\tau k_s [-0.01(\Delta C_{N_n}^{INV} - 0.5) + 2(\Delta C_{N_n}^{D2})^2]; & \text{if } \dot{\alpha}_n > 0 \\ 2\tau k_s; & \text{if } \dot{\alpha}_n \leq 0. \end{cases} \quad (47)$$

### 2.3 Adema-Snel 2nd Order Model

The recently developed model of Adema (Adema et al., 2019) improves the original Snel model (Snel, 1997) in several aspects. Instead of using the lift coefficient ( $C_L$ ), the normal force coefficient ( $C_N$ ) is used, similar to the LB model (Leishman and Beddoes, 1989). The total dynamic response of the airfoil is formulated as:

$$230 \quad C_{N_n}^D = C_{N_n}^{VISC} + \Delta C_{N_n}^{D1} + \Delta C_{N_n}^{D2} \quad (48)$$

$$C_{T_n}^D = C_{T_n}^{VISC} + \cancel{\Delta C_{T_n}^{D1}}^0 + \cancel{\Delta C_{T_n}^{D2}}^0 \quad (49)$$

$$C_{M_n}^D = C_{M_n}^{VISC} + \cancel{\Delta C_{M_n}^{D1}}^0 + \cancel{\Delta C_{M_n}^{D2}}^0 \quad (50)$$

The model introduces some modifications of the original model in terms of: (1) projected  $k_s$ , (2) the first order coefficient and (3) the second order coefficient. The mathematical formulation of the first order term of the model is listed as:

$$235 \quad \tau \Delta \dot{C}_{N_n}^{D1} + K f_{10n} \Delta C_{N_n}^{D1} = F_{1n} \quad (51)$$

$$F_{1n} = \tau \Delta \dot{C}_{N_n}^{INV} \quad (52)$$

$$\Delta C_{N_n}^{INV} = C_{N_n}^{INV} - C_{N_n}^{VISC} = \frac{dC_N}{d\alpha} (\alpha_n - \alpha_0^{INV}) - C_{N_n}^{VISC} \quad (53)$$

$$K f_{10n} = \begin{cases} \frac{1 + 0.2\Delta C_{N_n}^{INV}}{8(1 + 60\tau\dot{\alpha}_n)}; & \text{if } \dot{\alpha}_n C_{N_n}^{INV} \leq 0 \\ \frac{1 + 0.2\Delta C_{N_n}^{INV}}{8(1 + 80\tau\dot{\alpha}_n)}; & \text{if } \dot{\alpha}_n C_{N_n}^{INV} > 0 \end{cases} \quad (54)$$

and for the second order correction term as

$$240 \quad \tau^2 \Delta \ddot{C}_{N_n}^{D2} + K f_{21n} \Delta \dot{C}_{N_n}^{D2} + K f_{20n} \Delta C_{N_n}^{D2} = F_{2n} \quad (55)$$

$$F_{2n} = 0.01k_s (-0.04\Delta C_{N_n}^{INV} + 1.5\tau \Delta \dot{C}_{N_n}^{INV}). \quad (56)$$

$$K f_{20n} = 10(k_s \sin \alpha_n)^2 [1 + 3(\Delta C_{N_n}^{D2})^2] [1 + 280^2 \tau^2 \dot{\alpha}_n^2] \quad (57)$$

$$K f_{21n} = \begin{cases} 60\tau k_s [-0.01(\Delta C_{N_n}^{INV} - 0.5) + 2(\Delta C_{N_n}^{D2})^2]; & \text{if } \dot{\alpha}_n > 0 \\ 60\tau k_s [-0.01(\Delta C_{N_n}^{INV} - 0.5) + 14(\Delta C_{N_n}^{D2})^2]; & \text{if } \dot{\alpha}_n \leq 0 \end{cases} \quad (58)$$

One may notice that Equation (56) contains  $\tau$  in the second term of the right hand side (RHS). This is intended to remove  
245 the dependency of the model to the velocity as the input parameter. The other main difference with the original model is also

observed in Equation (57) where  $k_s$  is projected by  $\sin \alpha_n$ . At last, the downstroke motion of the second order term of Equation (58) is modified to enable vortex shedding effects.

To sum up the characteristics of above discussed state-of-the-art dynamic stall models, Table 1 lists the properties of each model and in which aspects the model can be improved further.

**Table 1.** Properties of the discussed dynamic stall models.

| Model name       | First/second order | Higher harmonics | Model $C_L$ | Model $C_D$ | Model $C_M$ |
|------------------|--------------------|------------------|-------------|-------------|-------------|
| Leishman-Beddoes | first order        | -                | x           | x           | x           |
| Snel             | second order       | x                | x           | -           | -           |
| Adema-Snel       | second order       | x                | x           | x           | -           |

## 250 2.4 New 2nd order IAG model

The proposed IAG model is developed based on knowledge gained from four different models; Leishman-Beddoes, Snel, Adema-Snel and ONERA (Tran and Petot, 1980; Dat and Tran, 1981; Petot, 1989) models with modifications. Similar to the modern models like those from Snel (and ONERA) and its derivatives, the present model is constructed by two main terms: the first order and second order corrections. The total dynamic response of the airfoil is formulated as:

$$255 \quad C_{L_n}^D = C_{L_n}^{D1} + \Delta C_{L_n}^{D2} \quad (59)$$

$$C_{D_n}^D = C_{D_n}^{D1} + \Delta C_{D_n}^{D2} \quad (60)$$

$$C_{M_n}^D = C_{M_n}^{D1} + \Delta C_{M_n}^{D2} \quad (61)$$

with  $^{D1}$  and  $^{D2}$  being the first and second order corrections, respectively. Below the description of the modifications done for the new model will be discussed in detail.

### 260 2.4.1 First order correction

Based on the Hopf-Bifurcation model of Truong (Truong, 1993) that used the LB-Model as the starting point of the first order correction, the present model does similarly. Despite that, the LB model is not transferred into the state-space formulation, but it is retained as the indicial formulation. The model applies the superposition of the solution using a finite-difference approximation to Duhamel's integral to construct the cumulative effect to an arbitrary time history of angle of attack. The LB-model described in Sections 2.1.1 to 2.1.3 will be used with the following modifications:

In the above LB-Model, predictions for drag is not accurate as will be shown in Section 3.1. This inaccuracy lies in the determination of  $\eta$  in Equation (19) for the tangential force component because drag is more sensitive to tangential force than the lift force does. Also to maintain simplicity, parameter  $\eta$  is removed and the tangential force is obtained from the static data



at the time-lagged angle of attack  $\alpha_{f_n}$  by:

$$270 \quad C_{T_n}^f = C_T^{VISC}(\alpha_{f_n}). \quad (62)$$

If one uses this formulation directly, at some point drag still becomes lower than the static drag value by a significant amount. By evaluating the experimental data for several airfoils and various flow conditions, this is not physical at small angles of attack especially in the downstroke regime, where it usually just returns to the static value. In fact, those experimental data infer that strong drag hysteresis occurs only at high angles of attack beyond stall. Similarly, in the upstroke regime the drag value increases only slightly (approximately only 20%). In Figure 3, one can see that drag hysteresis occurs when

$$\zeta = \frac{1}{\pi} \frac{dC_N}{d\alpha} \left( \frac{1 + \sqrt{f_n}}{2} \right)^2 \lesssim 0.76. \quad (63)$$

Based on these observations, a simple drag limiting factor is adopted when  $\zeta_n \geq 0.76$  as:

$$C_{D_n}^D = \begin{cases} 1.2C_{D_n}^{VISC}; & \text{if } C_{D_n}^D > 1.2C_{D_n}^{VISC} \text{ and } (C_{N_n}^P - C_{N_{n-1}}^P) \geq 0.0 \\ C_{D_n}^{VISC}; & \text{if } (C_{N_n}^P - C_{N_{n-1}}^P) < 0.0 \\ C_{D_n}^D; & \text{otherwise} \end{cases} \quad (64)$$

Note that for the purpose of numerical implementation, it is always recommended in practice to adopt relaxation to avoid any discontinuity which may present in the above formulation. The effects of these modifications are displayed in Figure 4.

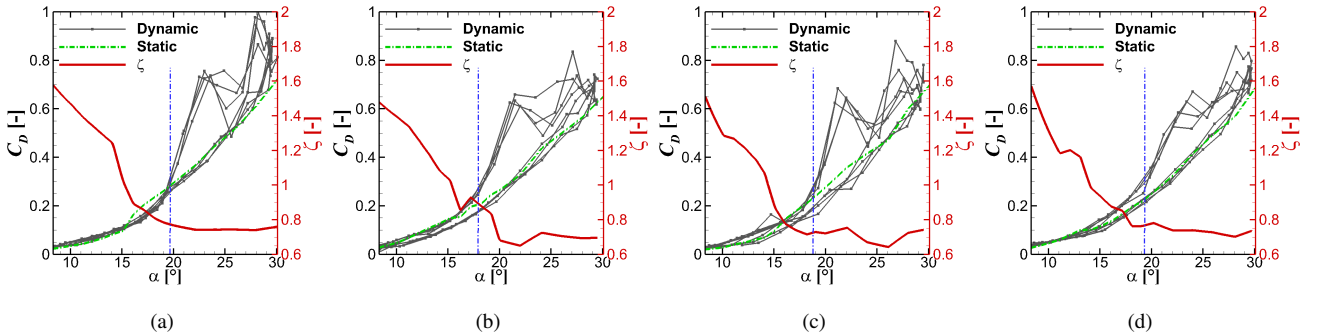

**Figure 3.** Relation between drag hysteresis in the stall regime with weighted separation parameter  $\zeta$  for four airfoils. From left to right: S801 (13.5%), NACA4415 (15%), S809 (21%) and S814 (24%).

It will also be shown in Section 3.1, that predicting moment coefficient directly from the static polar data by means of the time-lagged angle of attack has its drawback in the correct damping effect calculation. One may obtain better results by using the "fitting function" as in Equation (20) instead of using Equation (34). However, this limits the usability for different airfoils, since the fitting has to be done again for each individual airfoil. For wind turbine simulations, this is fairly impractical because a wind turbine blade is usually constructed by several different airfoils, not to mention the interpolated shapes in between each airfoil position. To solve for this issue, a relatively simple approach is introduced by applying a time delay on the circulatory

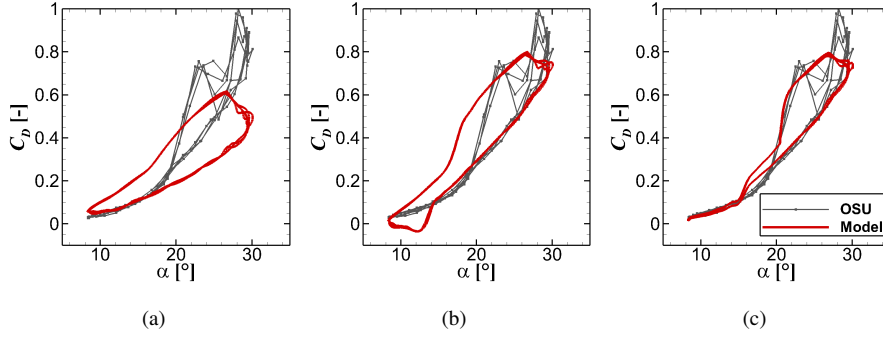

**Figure 4.** Drag reconstruction in comparison with the experimental data for S801 airfoil (Ramsay et al., 1996) applying: (a) Equation (19), (b) Equation (62) and (c) Equations (62) + (64).

moment response as:

$$C_{M_n}^C = \begin{cases} C_{M_{n-1}}^C \exp\left(-\frac{\Delta s}{T_M^U}\right) - C_{Pf_n}(C_{V_n} - C_{V_{n-1}}) \exp\left(-\frac{\Delta s}{2T_M^U}\right); & \text{if } \tau_{v_n} < T_{vl} \text{ and } \Delta\alpha_n \geq 0 \\ C_{M_{n-1}}^C \exp\left(-\frac{\Delta s}{T_M^D}\right) - C_{Pf_n}(C_{V_n} - C_{V_{n-1}}) \exp\left(-\frac{\Delta s}{2T_M^D}\right); & \text{if } \Delta\alpha_n < 0 \\ C_{M_{n-1}}^C; & \text{otherwise} \end{cases} \quad (65)$$

where,

$$C_{Pf_n} = K_f^C \frac{dC_N}{d\alpha} (\alpha_n^{CRIT} - \alpha_0^{INV}). \quad (66)$$

with  $K_f^C$ ,  $T_M^U$  and  $T_M^D$  being constants relatively insensitive to airfoils. Furthermore, the second condition of Equation (35) is modified to avoid discontinuity which occurs at a large reduced frequency (eg.  $k = 0.2$ ), for any LB-based models without re-calibration of the time constant as:

$$\tau_{v_n} = \begin{cases} \tau_{v_{n-1}} + 0.45 \frac{\Delta t}{c} V; & \text{if } C_{N_n}^{P1} > C_N^{CRIT} \\ \tau_{v_{n-1}} \exp(-\Delta s); & \text{if } C_{N_n}^{P1} < C_N^{CRIT} \text{ and } \Delta\alpha_n \geq 0 \\ \tau_{v_{n-1}}; & \text{otherwise} \end{cases} \quad (67)$$

The effects of these modifications are displayed in Figure 5.

The total first order dynamic response of the airfoil is formulated as:

$$C_{N_n}^{D1} = C_{N_n}^f + C_{N_n}^V \quad (68)$$

$$C_{T_n}^{D1} = C_{T_n}^f \quad (69)$$

$$C_{M_n}^{D1} = C_{M_n}^f + C_{M_n}^V + C_{M_n}^C \quad (70)$$

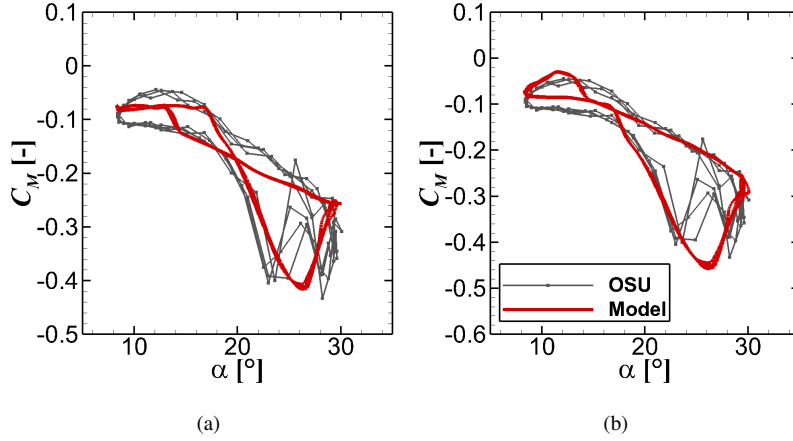

**Figure 5.** Moment reconstruction in comparison with the experimental data for S801 airfoil (Ramsay et al., 1996) applying: (a) Equation (34) and (b) Equation (65).

where the definition and description of each variable was given in Section 2.1 for the LB model. Thus the first order lift and drag responses can be obtained by

$$C_{L_n}^{D1} = C_{N_n}^{D1} \cos \alpha_n - C_{T_n}^{D1} \sin \alpha_n \quad (71)$$

$$C_{D_n}^{D1} = C_{N_n}^{D1} \sin \alpha_n + C_{T_n}^{D1} \cos \alpha_n \quad (72)$$

### 2.4.2 Second order correction

The second order correction takes the form of the non-linear ordinary differential equation according to the second order correction of the Snel (Snel, 1997) and Adema-Snel (Adema et al., 2019) models. Generally, the basis of implementation of the present model mostly uses the Adema-Snel (Adema et al., 2019) model where the normal force is used instead of the lift force as for the original Snel model (Snel, 1997) as:

$$\Delta \ddot{C}_{N_n}^{D2} + K f_{21_n} \Delta \dot{C}_{N_n}^{D2} + K f_{20_n} \Delta C_{N_n}^{D2} = F_{2_n} \quad (73)$$

This way, shedding effects apply not only on the lift force but also on the drag force. Note that  $\tau$  is not present in Equation (73) in contrast to the original formulation in Equations (44) and (55). The equation is changed because the time derivatives in the above equation is no longer with respect to time but to  $s = 2Vt/c$ , similar to the ONERA model (Tran and Petot, 1980; Dat and Tran, 1981; Petot, 1989). This is done to nondimensionalize the equations.

In Equation (57), the  $k_s$  was projected as a function of the angle of attack by  $\sin \alpha_n$ . This modification causes problem when the hysteresis effect takes place in both positive and negative angles because Equation (57) will be zero and then negative, causing instability of the ODE. Thus, the original form of the Snel model (Snel, 1997) is retained in the present model, but the constant is modified as.

$$K f_{20_n} = 20k_s^2 [1 + 3(\Delta C_{N_n}^{D2})^2] [1 + 3\dot{\alpha}_n^2] \quad (74)$$

The idea for the downstroke damping as in Equation (58) is adopted in the present model, the following form and constants are  
 320 used:

$$Kf_{21n} = \begin{cases} 150k_s[-0.01(\Delta C_{N_n}^{INV} - 0.5) + 2(\Delta C_{N_n}^{D2})^2]; & \text{if } \alpha_n > 0 \\ 30k_s[-0.01(\Delta C_{N_n}^{INV} - 0.5) + 14(\Delta C_{N_n}^{D2})^2]; & \text{if } \alpha_n \leq 0 \text{ and } \alpha_n \geq \alpha_n^{CRIT} \\ 0.2k_s; & \text{if } \alpha_n \leq 0 \text{ and } \alpha_n < \alpha_n^{CRIT} \end{cases} \quad (75)$$

Note again that  $\tau$  is not present in the above equation. The original formulation in Equation (58) replaces the damped oscillator  
 when  $\alpha_n \leq 0$  for a self-excited oscillator of Van-der-Pol type with more damping. This is in contrast with the implementation  
 done in (Truong, 2016), where the self-excited oscillator is only replaced by the damped oscillator, when the flow is reattached  
 325 on the return cycle. Under such circumstances, the oscillatory behavior still subsists in the return cycle, albeit with smaller  
 amplitude. To accommodate this aspect, the last term of Equation (75) is applied when the angle is smaller than  $\alpha_n^{CRIT}$ . As for  
 the forcing term, the original form of the Snel model (Snel, 1997) is adopted as:

$$F_{2n} = 0.5k_s(-0.15\Delta C_{N_n}^{INV} + 0.05\dot{\Delta C}_{N_n}^{INV}). \quad (76)$$

To facilitate the inclusion of the higher harmonic effects for the pitching moment, the idealized center of pressure obtained in  
 330 the first order correction given in Equation (26) is passed into the second order model. Thus, the dynamic moment reaction  
 takes the form:

$$\Delta C_{M_n}^{D2} = -C_{P_{v_n}} \Delta C_{N_n}^{D2} \quad (77)$$

Regarding the tangential force, a similar assumption is made as in Equation (48) where the influence of  $\Delta C_{T_n}^{D2}$  is neglected in  
 the formulation. Finally, the second order term of the lift ( $\Delta C_{L_n}^{D2}$ ) and drag ( $\Delta C_{D_n}^{D2}$ ) can be calculated easily. The effects of  
 335 the second order term are displayed in Figure 6.

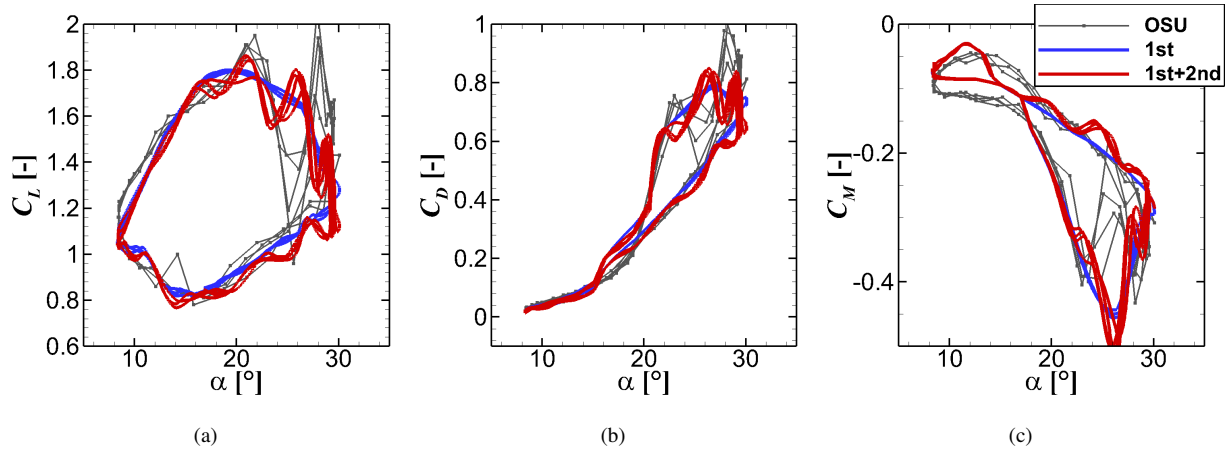

**Figure 6.** Airfoils response reconstruction in comparison with the experimental data for S801 airfoil (Ramsay et al., 1996) applying only the first order correction and with inclusion of the second order term. (a) Lift, (b) drag and (c) pitching moment.

## 2.5 Constants applied for the investigated dynamic stall models

The following constants are applied in the implemented dynamic stall models. These values are kept constant throughout the paper. The constants for the Leishman-Beddoes model are given in Table 2, for the ONERA model in Table 3 and for the proposed IAG model in Table 4. For any model developed based on the Leishman-Beddoes type, the critical angle of attack plays a major role. This can be obtained as the angle where the viscous pitching moment breaks or when the drag increases significantly. The applied critical angles are given in Table 5. The validation is done by comparing the calculations with experimental data performed at the Ohio State University for the S801 airfoil (13.5% relative thickness) (Ramsay et al., 1996), NACA4415 airfoil (15% relative thickness) (Hoffman et al., 1996), S809 airfoil (21% relative thickness) (Ramsay et al., 1995) and S814 airfoil (24% relative thickness) (Janiszewska et al., 1996). All selected test cases are for the airfoils employed with a leading edge grit (turbulator) to enable the "soiled" effects on a wind turbine blade at a Reynolds number of around 750K. Note that these polar data are different with the one used for example by Sheng et al. (Sheng et al., 2010) where the natural transition cases were taken. Therefore, the critical angles of attack are also different. The results of the studies are presented in the following sections.

**Table 2.** Constants applied for the Leishman-Beddoes model.

| $A_1$ | $A_2$ | $b_1$ | $b_2$ | $K_\alpha$ | $T_p$ | $T_f$ | $T_v$ | $T_{vl}$ | $K_v$ | $\eta$ |
|-------|-------|-------|-------|------------|-------|-------|-------|----------|-------|--------|
| 0.3   | 0.7   | 0.14  | 0.53  | 0.75       | 1.7   | 3.0   | 6.0   | 6.0      | 0.2   | 0.95   |

**Table 3.** Constants applied for the ONERA model.

| $\lambda_L$ | $s_L$ | $\sigma_L$ | $r_0$ | $r_2$ | $a_0$ | $a_2$ | $e_2$ |
|-------------|-------|------------|-------|-------|-------|-------|-------|
| 0.17        | $\pi$ | $2\pi$     | 0.2   | 0.2   | 0.3   | 0.2   | -0.35 |

**Table 4.** Constants applied for the IAG model.

| $A_1$ | $A_2$ | $b_1$ | $b_2$ | $K_\alpha$ | $T_p$ | $T_f$ | $T_v$ | $T_{vl}$ | $K_v$ | $K_f^C$ | $T_m^U$ | $T_m^D$ |
|-------|-------|-------|-------|------------|-------|-------|-------|----------|-------|---------|---------|---------|
| 0.3   | 0.7   | 0.7   | 0.53  | 0.75       | 1.7   | 3.0   | 6.0   | 6.0      | 0.2   | 0.1     | 1.5     | 1.5     |

**Table 5.** Critical angle of attack ( $\alpha_n^{CRIT}$ ) applied for the Leishman-Beddoes and IAG models.

| S801  | NACA4415 | S809  | S814 |
|-------|----------|-------|------|
| 15.1° | 10°      | 14.1° | 10°  |

**3 Results and Discussion**

350 The four state-of-the-art dynamic stall models reviewed above (Leishman-Beddoes, Snel, Adema-Snel) have been used as a basis for examining the dynamic loads of four different pitching airfoils at various flow conditions. Experience gained from those models is used to formulate a new 2nd order dynamic stall model, namely IAG model by evaluating the weakness and strength of each model. The presented second order models need to solve a set of differential equations. For this purpose, the Euler-Heun forward integration method is used.

355 **3.1 Comparison against experimental data**

This section compares the predicted dynamic forces in comparison with the measurement data. For a fair comparison, all models are assessed with the same time step size of  $\Delta t = T/1440$ , with  $T$  being the pitching period. The evaluations are performed on the S801 airfoil at  $k = 0.073$ . The comparison of each model is shown in Figures 7 to 9 for the Snel, Adema and IAG models, respectively. Note that the constants of the other four existing dynamic stall models are taken directly from literature without further calibration for the S801 airfoil. Therefore, it is already expected that their performance will not be optimal. The main purpose of the comparison is not to study their accuracy, but to analyze the robustness of each model for a different airfoil without tuning the constants. On the other hand, the constants for the IAG model in Table 4 were obtained using the S801 airfoil. To enable a fair assessment on the model robustness, the IAG model will also be used to reconstruct the dynamic polar data of four airfoils with different relative thickness without changing the constants in Section 3.6.

365 The original Snel models cannot predict the drag and moment coefficients in the original formulations. Thus, only the static polar data is shown. The Snel model actually shows an acceptable accuracy even though the constants are taken as found in

literature. The higher harmonic effects are unfortunately not captured by this model. This is further refined by the Adema model which was developed as an improvement for the Snel model. The model performs fairly well for the lift and drag

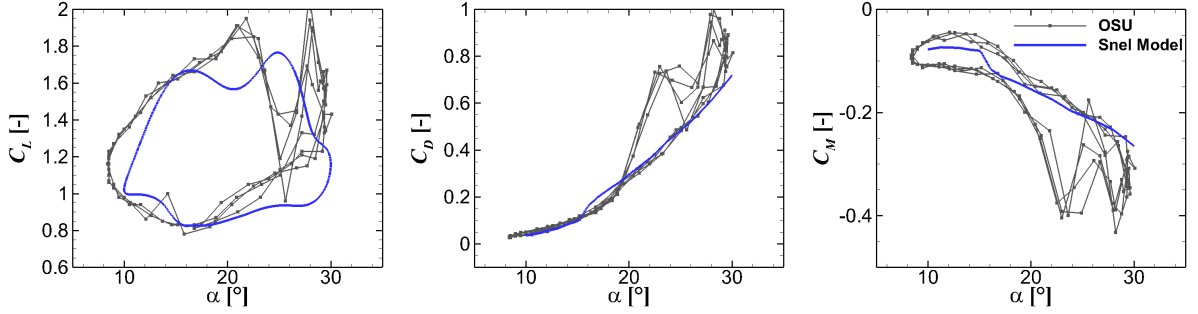

**Figure 7.** Dynamic forces reconstruction using the Snel model in comparison with the measurement data (Ramsay et al., 1996) for  $\Delta t = T/1440$ . S801 airfoil,  $k = 0.073$ ,  $\bar{\alpha} = 20^\circ$ ,  $\Delta\alpha = 10^\circ$ .

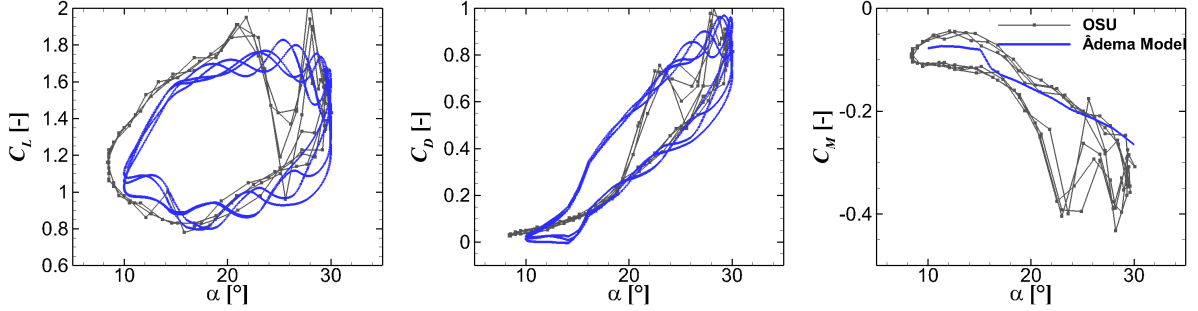

**Figure 8.** Dynamic forces reconstruction using the Adema model in comparison with the measurement data (Ramsay et al., 1996) for  $\Delta t = T/1440$ . S801 airfoil,  $k = 0.073$ ,  $\bar{\alpha} = 20^\circ$ ,  $\Delta\alpha = 10^\circ$ .

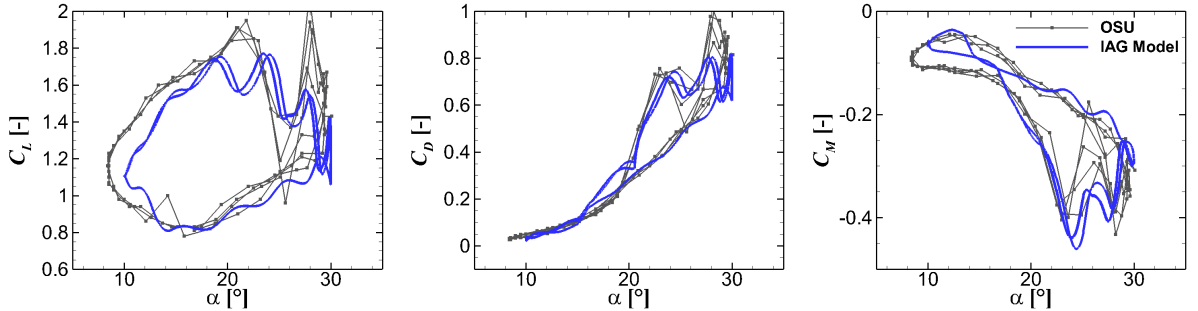

**Figure 9.** Dynamic forces reconstruction using the IAG model in comparison with the measurement data (Ramsay et al., 1996) for  $\Delta t = T/1440$ . S801 airfoil,  $k = 0.073$ ,  $\bar{\alpha} = 20^\circ$ ,  $\Delta\alpha = 10^\circ$ .

predictions, though the drag value at small angles of attack is a bit off. The pitching moment prediction is also not included  
 370 in its formulations. These disadvantages are better treated in the proposed IAG model. Not only the prediction of the lift  
 coefficient, but also the accuracy of drag prediction is improved significantly. The modifications described in Section 2.4 result  
 in the improvement at low and high angles of attack regimes. The model is also able to reconstruct the pitching moment polar  
 accurately, which is important for aeroelastic calculations of wind turbine blades.

For the following sections, the proposed IAG model will be tested under various flow conditions and for several airfoils at  
 375 various relative thicknesses in comparison with measurement data. Note that these calculations are performed without changing  
 the constants to assess the robustness of the model at different flow conditions.

### 3.2 Effects of time signal deviation

The actual pitching motion within the OSU measurement differs slightly from the intended motion. The actual time series  
 of the angle of attack is included in the experimental data (Ramsay et al., 1996; Hoffman et al., 1996; Ramsay et al., 1995;  
 380 Janiszewska et al., 1996). To assess the effects of this time signal deviation on the aerodynamic response, the calculations  
 using this time signal data were performed applying the IAG model. The results are compared with the experimental data and  
 the results of the IAG model presented in Section 3.1. Note that this time signal data is fairly coarse, and can cause problems  
 for second order dynamic stall models because the gradient of  $\alpha$  change can be extremely large. To cover for this issue, the  
 time signal is interpolated in between each available point using a third-order cubic-spline interpolation. The time signals are  
 385 discretized by  $\Delta t = T/1440$  over a single pitching period. The first period of oscillation is used for initialization of the time  
 integration, thus a constant angle of attack is applied as shown in Figure 10.

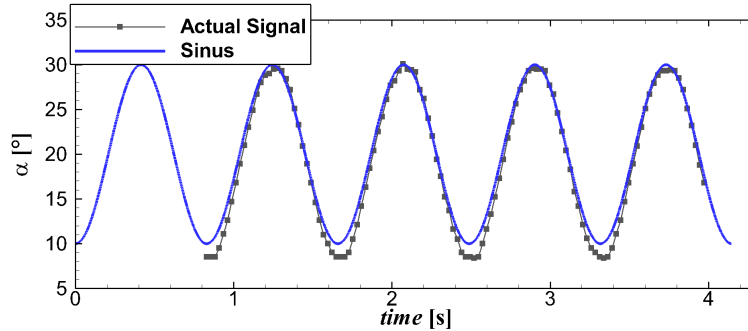

**Figure 10.** Comparison of the timeseries of the idealized sinusoidal angle of attack to the exact signals in the experimental campaign for S801 airfoil,  $k = 0.073$ ,  $\bar{\alpha} = 20^\circ$ ,  $\Delta\alpha = 10^\circ$ .

Figure 11 presents the influence of the time signal variation on the aerodynamic performance in terms of  $C_L$ ,  $C_D$  and  $C_M$ .  
 TS labels the exact time signals in the experimental campaign. Although the time signal difference has almost no influence of  
 the global prediction characteristics, some deviation with the idealized sinusoidal motion can be noticed clearly. For example,  
 390 the increased lift build up in the upstroke regime before stall and the location of the lift stall. Some deviations on the drag and



pitching moment coefficients are observed as well. For the rest of the paper, the prediction procedure using the actual time signal from the experimental data is used for best consistency with the experimental campaign.

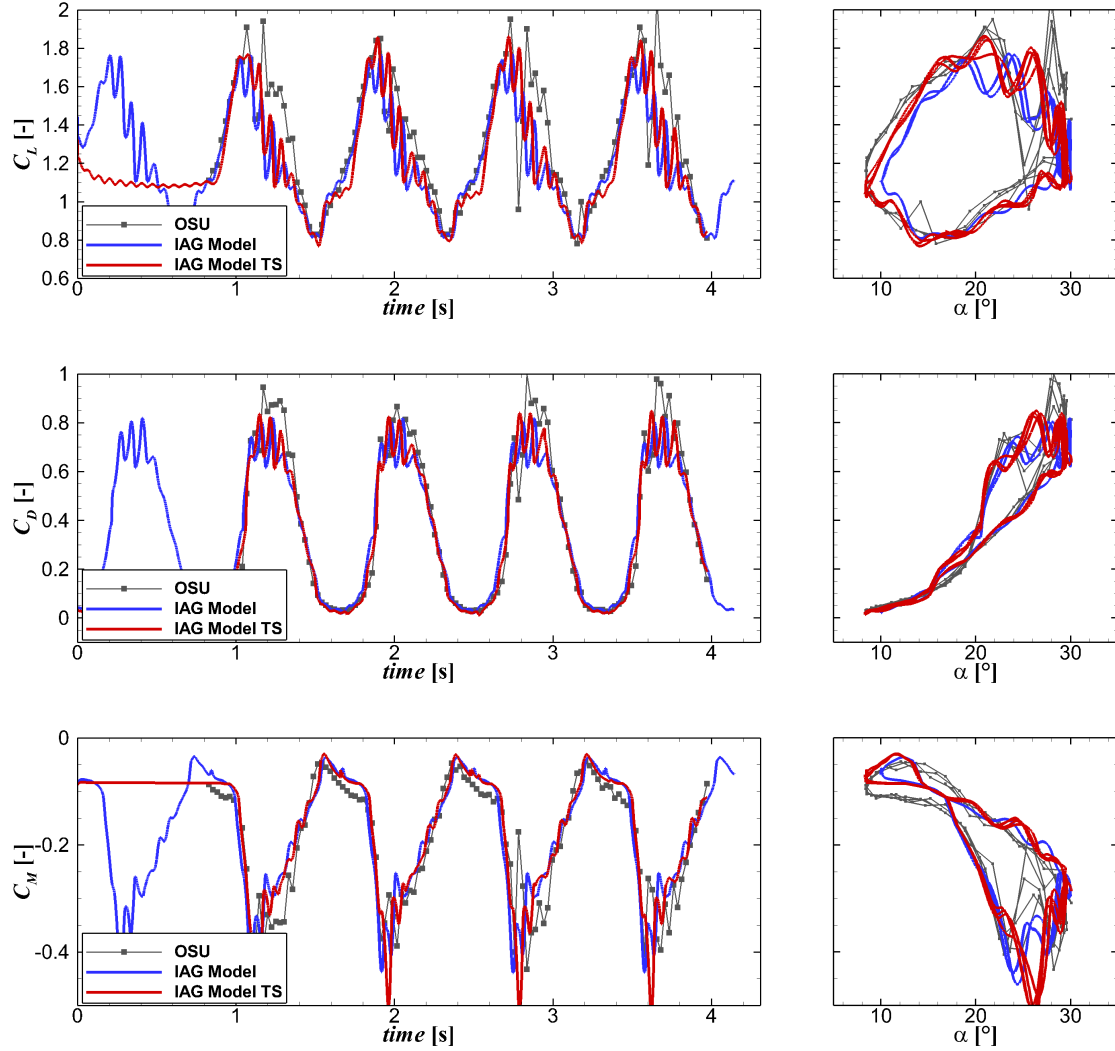

**Figure 11.** Dynamic forces reconstruction by the IAG model in comparison with the measurement data (Ramsay et al., 1996) for  $\Delta t = T/1440$  using the actual angle of attack in the experimental campaign. TS labels the exact time signals in the experimental campaign. S801 airfoil,  $k = 0.073$ ,  $\bar{\alpha} = 20^\circ$ ,  $\Delta\alpha = 10^\circ$ .

### 3.3 Performance of the model for different mean angles of incidence

In this section, the effects of the mean angle of attack are evaluated. Three different angles of attack at the same inflow conditions are selected for this purpose. These are  $\bar{\alpha} = 8^\circ$ ,  $14^\circ$  and  $20^\circ$ . Note that these mean angles of attack are only approximations

since the actual time signal data from the experimental campaign is used. The selected mean angles represent the regime of attached flow, partly separated and fully separated flow conditions. These are helpful to assess the model performance under various flow situations.

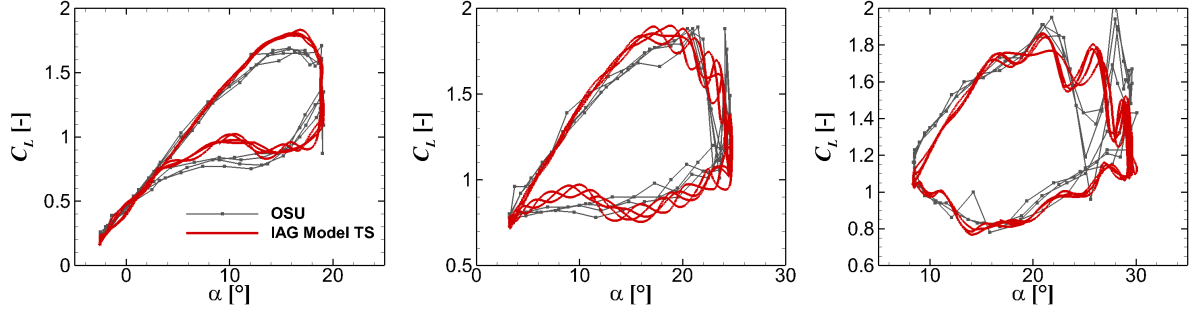

**Figure 12.** Lift reconstruction by the IAG model in comparison with the measurement data (Ramsay et al., 1996) for  $\Delta t = T/1440$  using the actual angle of attack in the experimental campaign at various  $\bar{\alpha}$ . From left to right:  $\bar{\alpha} = 8^\circ$ ,  $\bar{\alpha} = 14^\circ$  and  $\bar{\alpha} = 20^\circ$ . S801 airfoil,  $k = 0.073$ ,  $\Delta\alpha = 10^\circ$ .

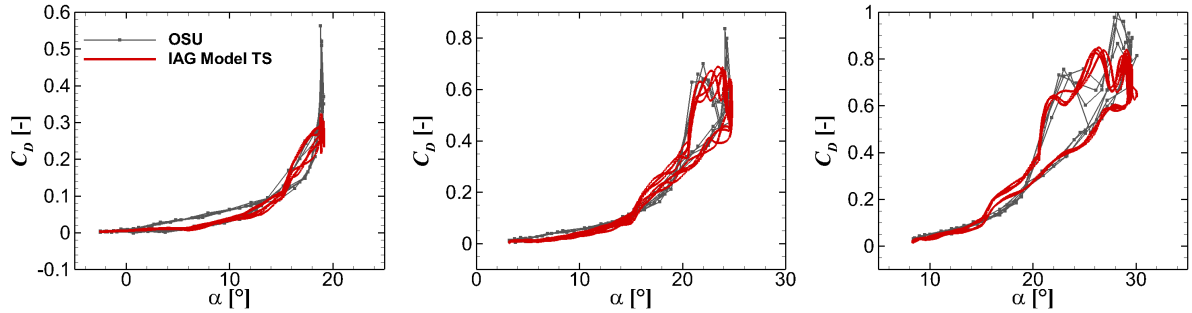

**Figure 13.** Drag reconstruction by the IAG model in comparison with the measurement data (Ramsay et al., 1996) for  $\Delta t = T/1440$  using the actual angle of attack in the experimental campaign at various  $\bar{\alpha}$ . From left to right:  $\bar{\alpha} = 8^\circ$ ,  $\bar{\alpha} = 14^\circ$  and  $\bar{\alpha} = 20^\circ$ . S801 airfoil,  $k = 0.073$ ,  $\Delta\alpha = 10^\circ$ .

Figure 12 presents the results for the lift coefficient under these three investigated mean angles of attack. The model performs very well for these different cases. The maximum lift is a bit overestimated in the model for the lowest  $\bar{\alpha}$ , but in general all unsteady lift characteristics in the measurement data are reproduced in a sound agreement with the experimental data. A similar behavior is shown for the drag prediction depicted in Figure 13. The proposed model captures the increased drag effect and its shedding characteristics well. The simple modifications applied in Section 2.4 result in a good prediction of the drag coefficient as compared with the experimental data. In Figure 14, the prediction for pitching moment is shown. Here the predicted moment coefficient is in a good agreement with the measured values.

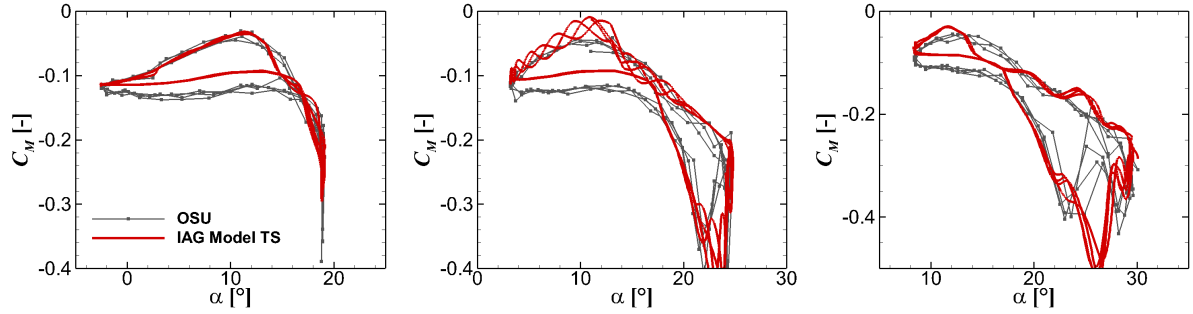

**Figure 14.** Pitching moment reconstruction by the IAG model in comparison with the measurement data (Ramsay et al., 1996) for  $\Delta t = T/1440$  using the actual angle of attack in the experimental campaign at various  $\bar{\alpha}$ . From left to right:  $\bar{\alpha} = 8^\circ$ ,  $\bar{\alpha} = 14^\circ$  and  $\bar{\alpha} = 20^\circ$ . S801 airfoil,  $k = 0.073$ ,  $\Delta\alpha = 10^\circ$

### 3.4 Performance of the model for different reduced frequencies

The effects of pitching frequency on the aerodynamic response will be discussed in this section. Three different reduced frequencies are examined, namely  $k = 0.036, 0.073$  and  $0.111$ . The stall regime is shown here, where the prediction is the most challenging. The actual time signals as of the measurement campaign are used, following the procedure described in Section

410 3.2.

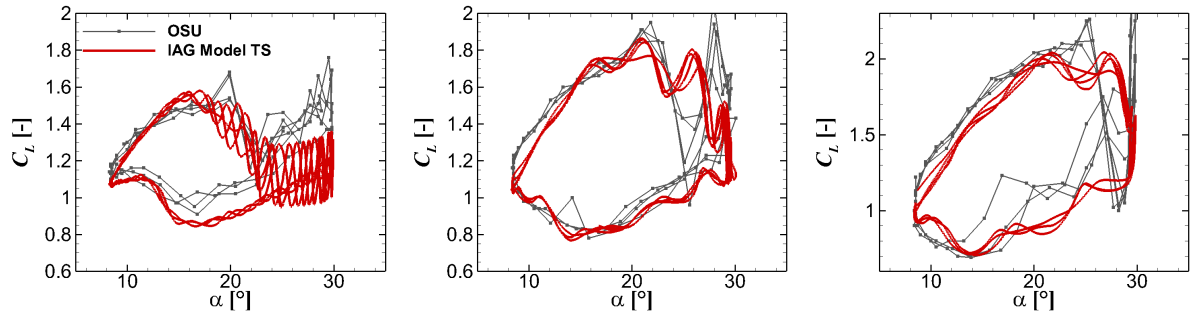

**Figure 15.** Lift reconstruction by the IAG model in comparison with the measurement data (Ramsay et al., 1996) for  $\Delta t = T/1440$  using the actual angle of attack in the experimental campaign at various  $k$ . From left to right:  $k = 0.036$ ,  $k = 0.073$  and  $k = 0.111$ . S801 airfoil,  $\bar{\alpha} = 20^\circ$ ,  $\Delta\alpha = 10^\circ$ .

Figure 15 displays the results for the dynamic lift coefficient response. The lowest reduced frequency of  $0.036$  is dominated by the viscous effects. It represents the case where the "delayed" angle of attack response is the weakest. It can be seen that the maximum attained lift coefficient increases with increasing  $k$ . The gradient of the lift polar in the upstroke and downstroke phase is also increasing as well. These characteristics are present in both experimental data and predictions delivered by the

415 IAG model. A similar behavior is also displayed in drag and pitching moment in Figures 16 and 17, respectively. It is obvious

that stall occurs much earlier for a smaller  $k$  value. One can see that the maximum amplitude of all three force components increases with increasing  $k$ . This can be dangerous for the structural stability, since the amplitude determines the fatigue loads.

To better investigate the effects of  $k$ , the IAG model is used to reconstruct the dynamic polar data at various  $k$  by applying an idealized sinusoidal motion as presented in Figure 18. Only the last DS cycle is shown for clarity of the observation. While the maximum amplitude of all three force components at low frequency domains increases with increasing  $k$  (blue and green markers), the amplitudes for all three forces at high frequency domains show different characteristics as shown in the Fourier transformation in Figure 19, albeit with much smaller values. The higher harmonic amplitudes are attributed to flow separation effects, while for low frequency domains are driven by the pitching motion (i.e., external unsteadiness or inflow).

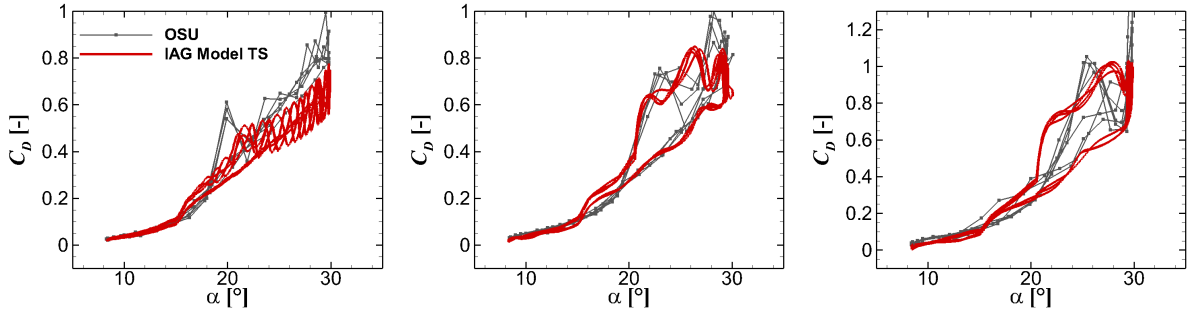

**Figure 16.** Drag reconstruction by the IAG model in comparison with the measurement data (Ramsay et al., 1996) for  $\Delta t = T/1440$  using the actual angle of attack in the experimental campaign at various  $k$ . From left to right:  $k = 0.036$ ,  $k = 0.073$  and  $k = 0.111$ . S801 airfoil,  $\bar{\alpha} = 20^\circ$ ,  $\Delta\alpha = 10^\circ$ .

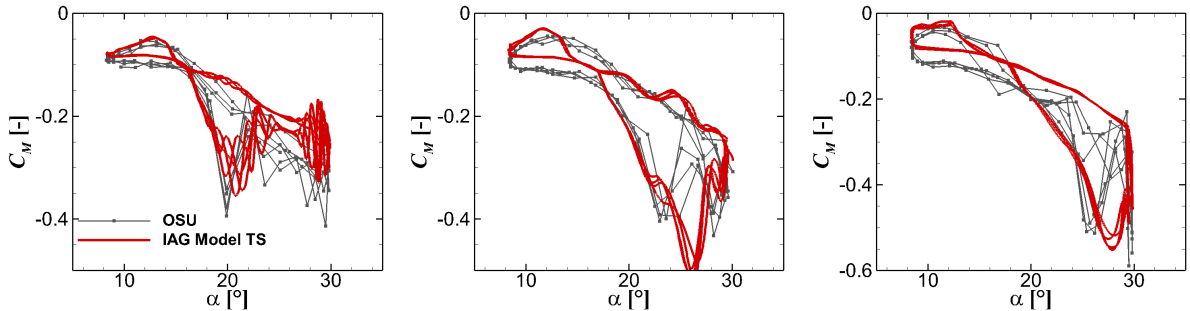

**Figure 17.** Pitching moment reconstruction by the IAG model in comparison with the measurement data (Ramsay et al., 1996) for  $\Delta t = T/1440$  using the actual angle of attack in the experimental campaign at various  $k$ . From left to right:  $k = 0.036$ ,  $k = 0.073$  and  $k = 0.111$ . S801 airfoil,  $\bar{\alpha} = 20^\circ$ ,  $\Delta\alpha = 10^\circ$ .

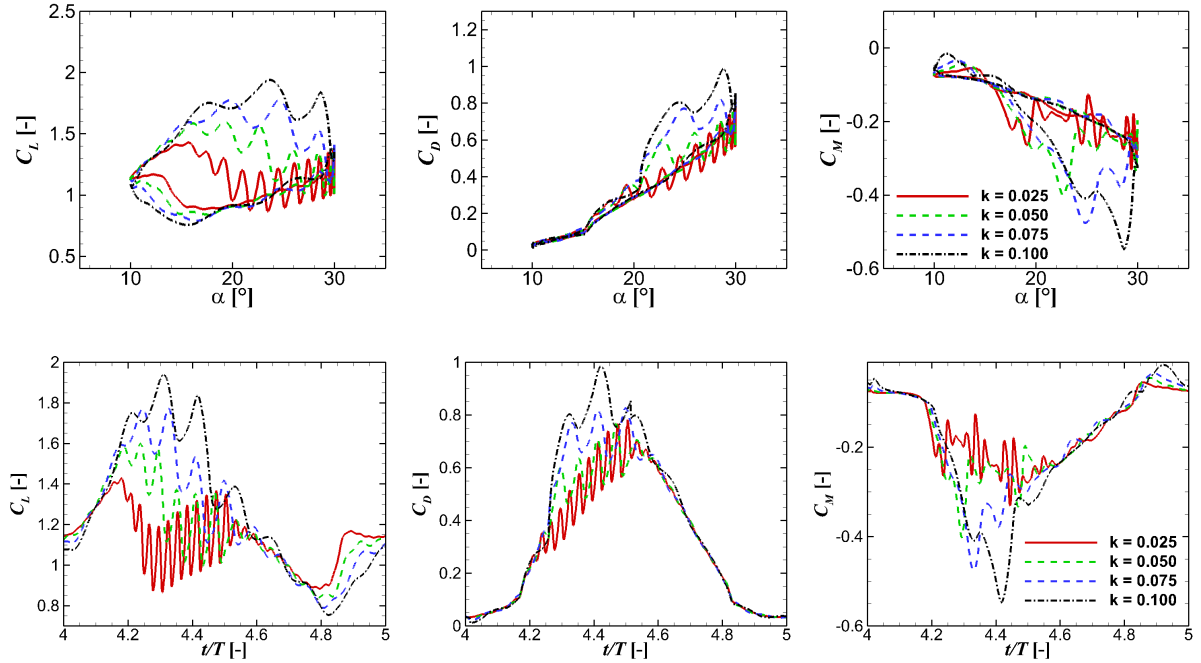

**Figure 18.** Effects of  $k$  on the aerodynamic response by the IAG model for  $\Delta t = T/1440$ . S801 airfoil,  $\bar{\alpha} = 20^\circ$ ,  $\Delta\alpha = 10^\circ$ . Top: polar, bottom: timeseries.

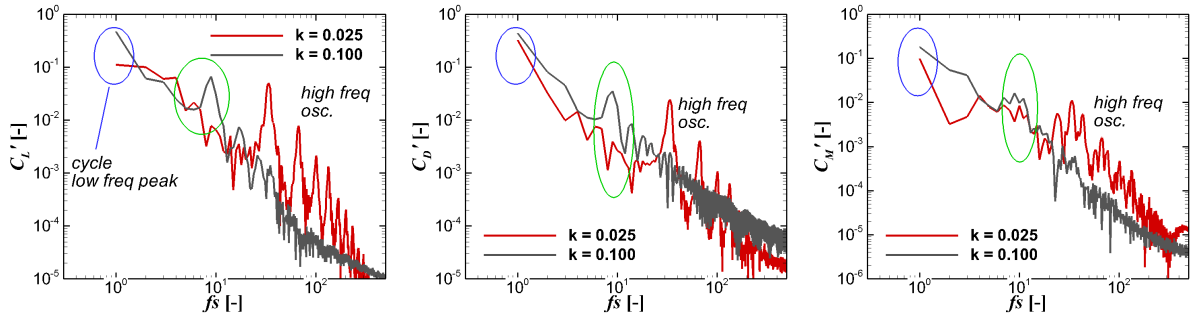

**Figure 19.** Fourier transformation of the predicted forces presented in Figure 18.  $f_s = f/f_0$  with  $f_0$  being the pitching frequency.

### 3.5 Performance of the model for different pitching amplitudes

425 In this section, the effects of pitching amplitude on the aerodynamic response of a pitching airfoil is investigated. The mean angle of attack is fixed at  $\bar{\alpha} = 20^\circ$ . Note again that  $\bar{\alpha}$  is only an approximation because the actual time signal data from the measurement campaign is applied. This large mean angle of attack is purposely selected because the post-stall characteristic is of interest and is well known for its violent vibration, even for the static condition. The small amplitude in this case means that the whole pitch oscillation occurs within the stall regime.

Figures 20 to 22 display the dynamic force responses due to pitching motion of the airfoil predicted by the IAG model in comparison with the experimental data. The model accurately reconstructs the dynamic forces despite the predicted case is challenging within the post stall regime. Interesting to note is that the small pitching amplitude case induces stronger shedding effects for lift than the larger amplitude case. This can be explained as following. As described by Leishman in his papers (Beddoes, 1982; Leishman, 1988; Leishman and Beddoes, 1989), the airfoil sees a lagged force response compared to the imposed disturbance. Therefore, in his model, a time-lagged angle of attack is introduced as the "effective" angle actually seen by the airfoil section. When the pitching motion takes place partly within the fully separated region (in the static case) and partly in the attached/partly separated flow region, the airfoil still sees the lower angle (where the flow is still attached) even though the pitching motion already reaches the post-stall regime. This effect stops/reduces when the effective angle is larger than the critical angle defined in Table 5. As the critical angle for the S801 airfoil is defined at  $15.1^\circ$ , the lower amplitude case is fully operating within the stall regime, where the attached flow effect is not present.

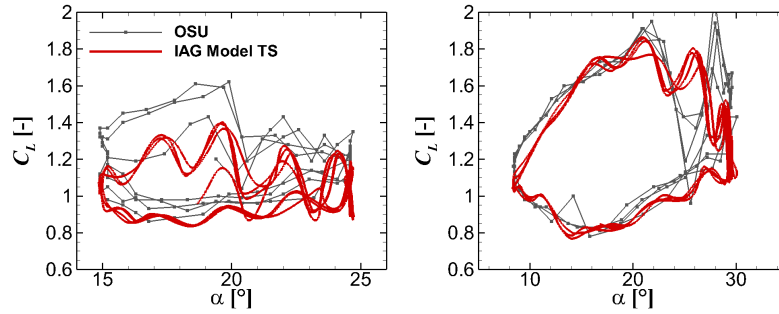

**Figure 20.** Lift reconstruction by the IAG model in comparison with the measurement data (Ramsay et al., 1996) for  $\Delta t = T/1440$  using the actual angle of attack in the experimental campaign at various  $\Delta\alpha$ . Left:  $\Delta\alpha = 5.5^\circ$ ; right:  $\Delta\alpha = 10^\circ$ . S801 airfoil,  $k = 0.073$ ,  $\bar{\alpha} = 20^\circ$ .

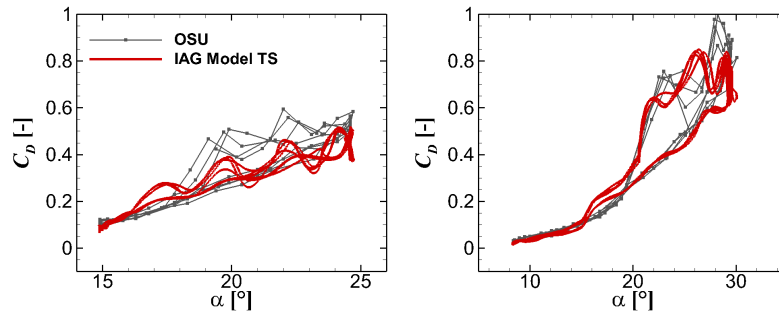

**Figure 21.** Drag reconstruction by the IAG model in comparison with the measurement data (Ramsay et al., 1996) for  $\Delta t = T/1440$  using the actual angle of attack in the experimental campaign at various  $\Delta\alpha$ . Left:  $\Delta\alpha = 5.5^\circ$ ; right:  $\Delta\alpha = 10^\circ$ . S801 airfoil,  $k = 0.073$ ,  $\bar{\alpha} = 20^\circ$ .

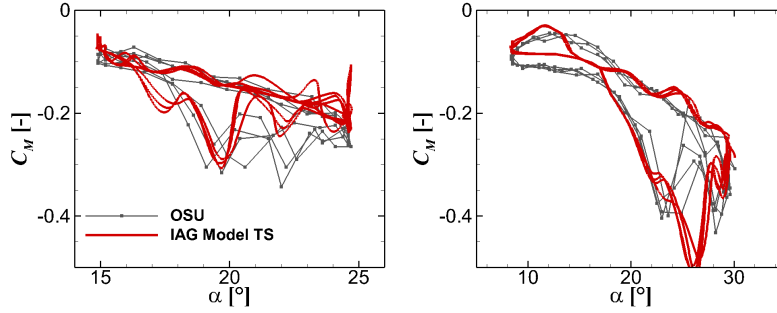

**Figure 22.** Pitching moment reconstruction by the IAG model in comparison with the measurement data (Ramsay et al., 1996) for  $\Delta t = T/1440$  using the actual angle of attack in the experimental campaign at various  $\Delta\alpha$ . Left:  $\Delta\alpha = 5.5^\circ$ ; right:  $\Delta\alpha = 10^\circ$ . S801 airfoil,  $k = 0.073$ ,  $\bar{\alpha} = 20^\circ$ .

### 3.6 Performance of the model for different airfoils

In this section, the performance and robustness of the proposed IAG model are assessed for airfoils with different relative thickness. All model constants in Table 4 remain the same for all calculations. The difference from one airfoil calculation to the other lies only in the critical angle of attack value as shown in Table 5. The value was obtained simply by looking at the static polar data where the viscous pitching moment breaks or when the drag increases significantly.

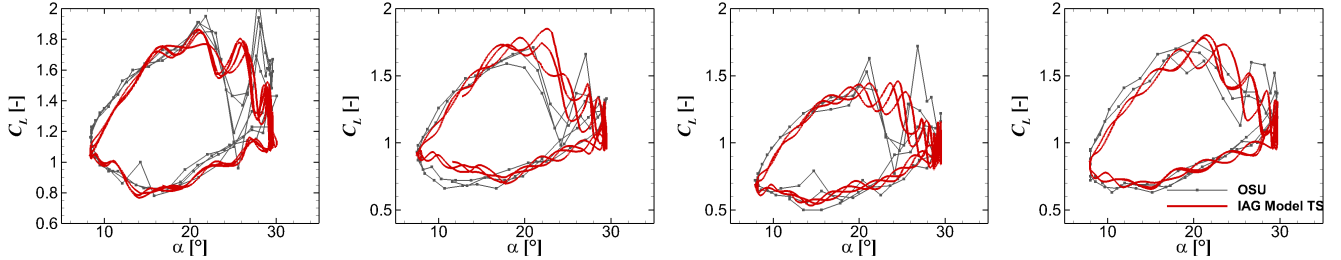

**Figure 23.** Lift reconstruction by the IAG model in comparison with the measurement data (Ramsay et al., 1996; Hoffman et al., 1996; Ramsay et al., 1995; Janiszewska et al., 1996) for  $\Delta t = T/1440$  using the actual angle of attack in the experimental campaign for different airfoils. From left to right: S801 (13.5%), NACA4415 (15%), S809 (21%) and S814 (24%).  $k = 0.073$ ,  $\bar{\alpha} = 20^\circ$ ,  $\Delta\alpha = 10^\circ$ .

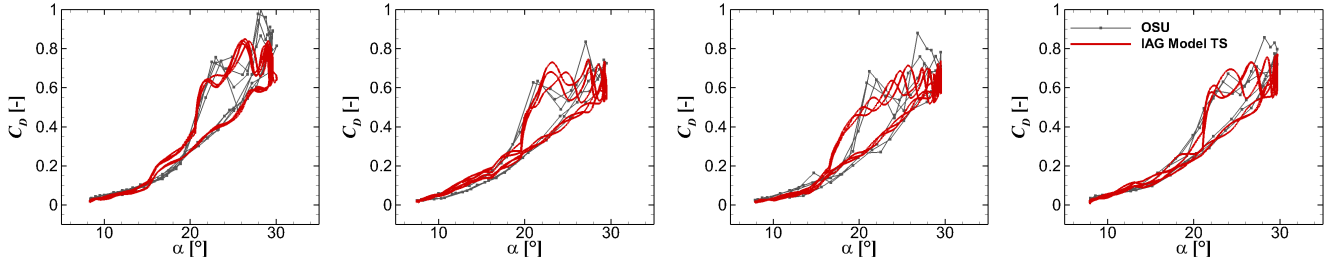

**Figure 24.** Drag reconstruction by the IAG model in comparison with the measurement data (Ramsay et al., 1996; Hoffman et al., 1996; Ramsay et al., 1995; Janiszewska et al., 1996) for  $\Delta t = T/1440$  using the actual angle of attack in the experimental campaign for different airfoils. From left to right: S801 (13.5%), NACA4415 (15%), S809 (21%) and S814 (24%).  $k = 0.073$ ,  $\bar{\alpha} = 20^\circ$ ,  $\Delta\alpha = 10^\circ$ .

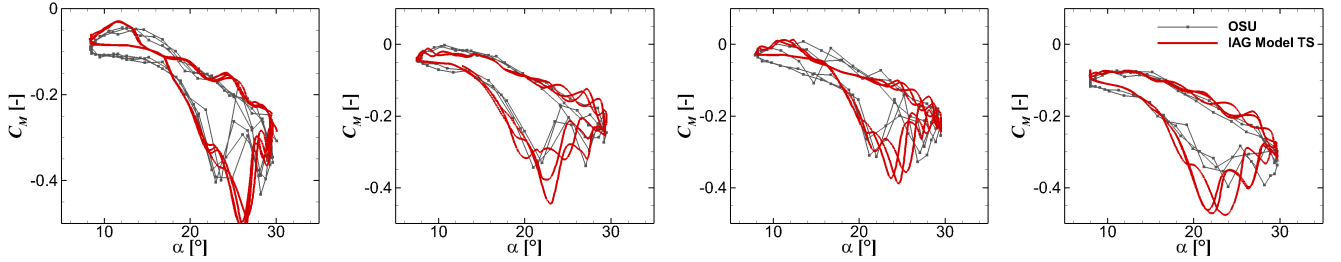

**Figure 25.** Pitching moment reconstruction by the IAG model in comparison with the measurement data (Ramsay et al., 1996; Hoffman et al., 1996; Ramsay et al., 1995; Janiszewska et al., 1996) for  $\Delta t = T/1440$  using the actual angle of attack in the experimental campaign for different airfoils. From left to right: S801 (13.5%), NACA4415 (15%), S809 (21%) and S814 (24%).  $k = 0.073$ ,  $\bar{\alpha} = 20^\circ$ ,  $\Delta\alpha = 10^\circ$ .



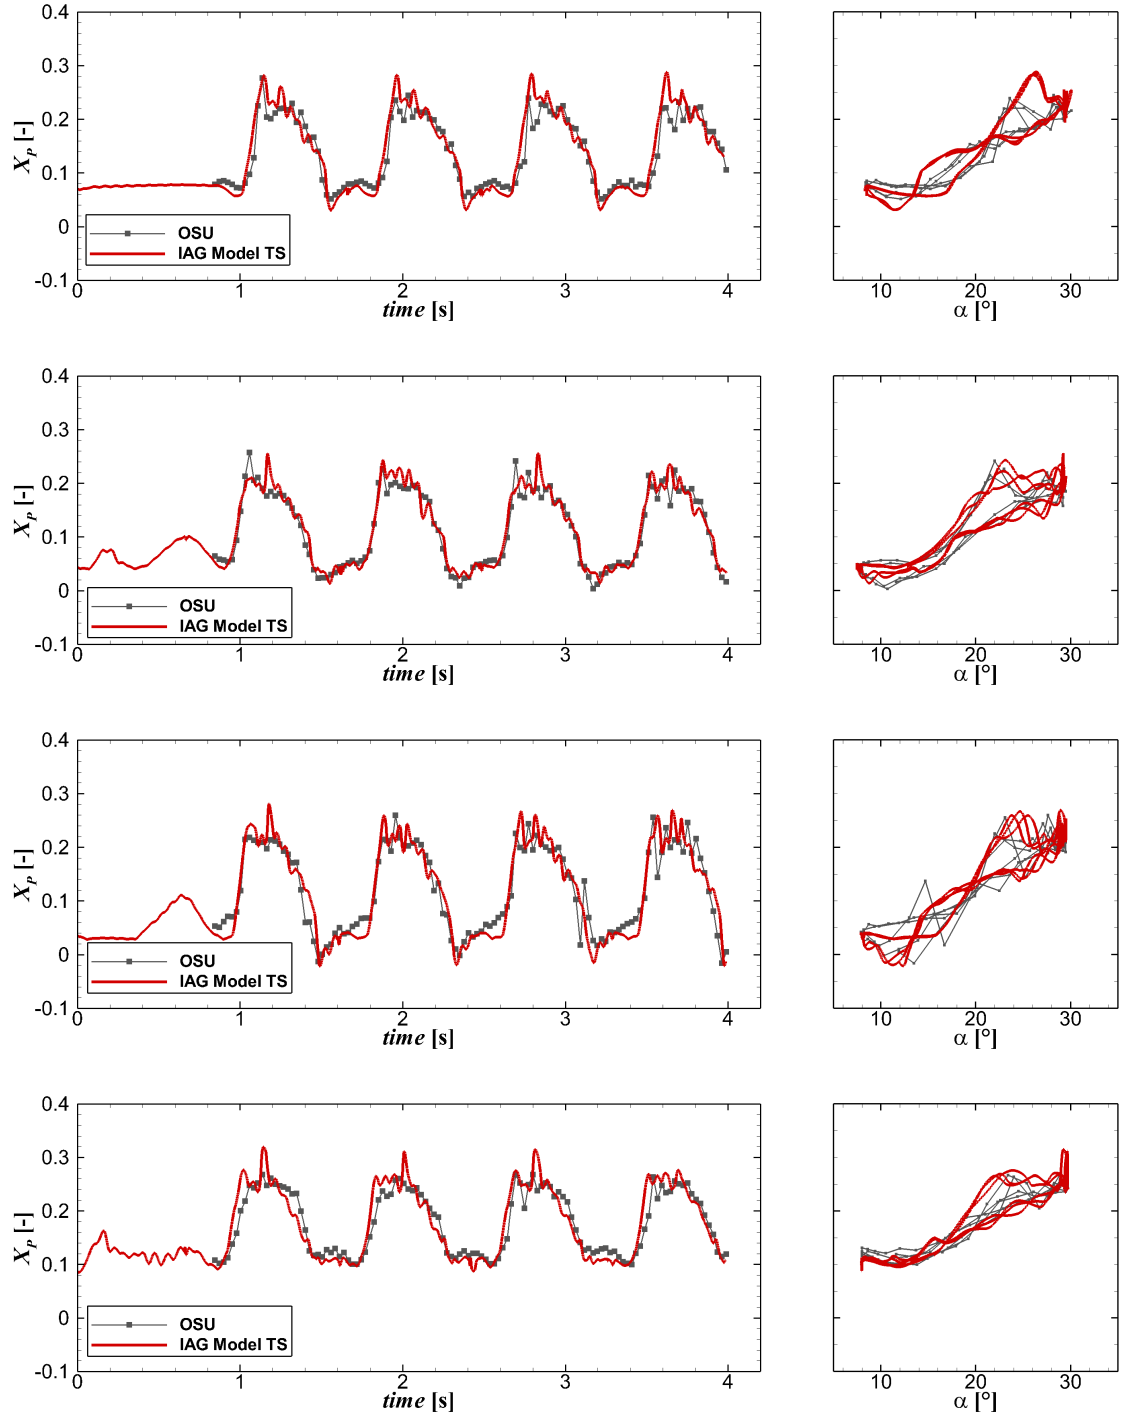

**Figure 26.** Center of pressure reconstruction in comparison with the measurement data by the IAG model for  $\Delta t = T/1440$  using the actual angle of attack in the experimental campaign for different airfoils. From top to bottom: S801 (13.5%), NACA4415 (15%), S809 (21%) and S814 (24%).  $k = 0.073$ ,  $\bar{\alpha} = 20^\circ$ ,  $\Delta\alpha = 10^\circ$ .

Despite the increased airfoil thickness from 13.5% to 24%, Figures 23 to 25 demonstrate that the reconstructed dynamic forces are in a good agreement with the experimental data, not only for the general trend but also the higher harmonic effects. As also the case for the Leishman-Beddoes model, it is important to select the appropriate value for the critical angle of attack. The simple approach used in the present paper has shown its usefulness and potentially reduce the complexity of parameter tuning for industrial applications. Elgammi et al. (Elgammi and Sant, 2016) for example defined two different critical angles of attack, one for  $C_N$  and the other for  $C_T$  that were shown to improve the prediction accuracy. Although their attempt might be beneficial, this is not followed in this work because one main aim of the studies is to reduce parameter tuning required for one to the other cases.

### 3.7 Predictions of the center of pressure

To further complement the analyses conducted in Section 3.6, the location of the actual pressure center is calculated in this section as:

$$X_p = -\frac{C_M}{C_L} \quad (78)$$

which indicates the distance of the pressure point to the quarter chord position where  $C_M$  is defined.

A correct location of the pressure point is important for determining the stability on aeroelastic simulations of wind turbine blades. The results of the calculations both for the experimental data and for the proposed IAG model are presented in Figures 26 for all four investigated airfoils both as time series and as the polar plot. It can be seen clearly that the agreement between the experimental data and the present predictions are excellent for all investigated airfoils.

### 3.8 $L_2$ norm of error analyses

Holierhoek et al . (Holierhoek et al., 2013) introduced a way for quantifying the absolute error between the experimental data and modeled lift coefficient. The general formulation reads:

$$L_2^\phi = \sqrt{\frac{1}{N} \sum_i^N (\phi_i^{mod} - \phi_i^{exp})^2} \quad (79)$$

with  $\phi$  being the variable of interest,  $i$  is the current sample and  $N$  is the total number of sample. In their paper, however, only lift was considered. Here all three force components will be shown for four different airfoils. Figure 27 displays the quantified error for two different flow category, attached and deep stall. **The timeseries of the angle of attack was obtained from the measured data by applying a third-order cubic-spline interpolation in between each available point.** One can see that generally the attached flow case is predicted very well, while the error increases as the flow condition becomes more complicated. Interestingly, especially for lift, it seems that the error reduces with increasing airfoil thickness. The reason for the larger error obtained for the thinner airfoil is attributed to the complex characteristics of the leading edge stall, causing severe load variations especially with increasing angle of attack. Thus, it makes the prediction more challenging. **Furthermore, the quantification of the error was also performed on two other dynamic stall models, Snel and Adema-Snel. The same approach**

for the angle of attack signal was applied. One can see that the IAG model shows its improved prediction especially for the deep stall case for all three force components.

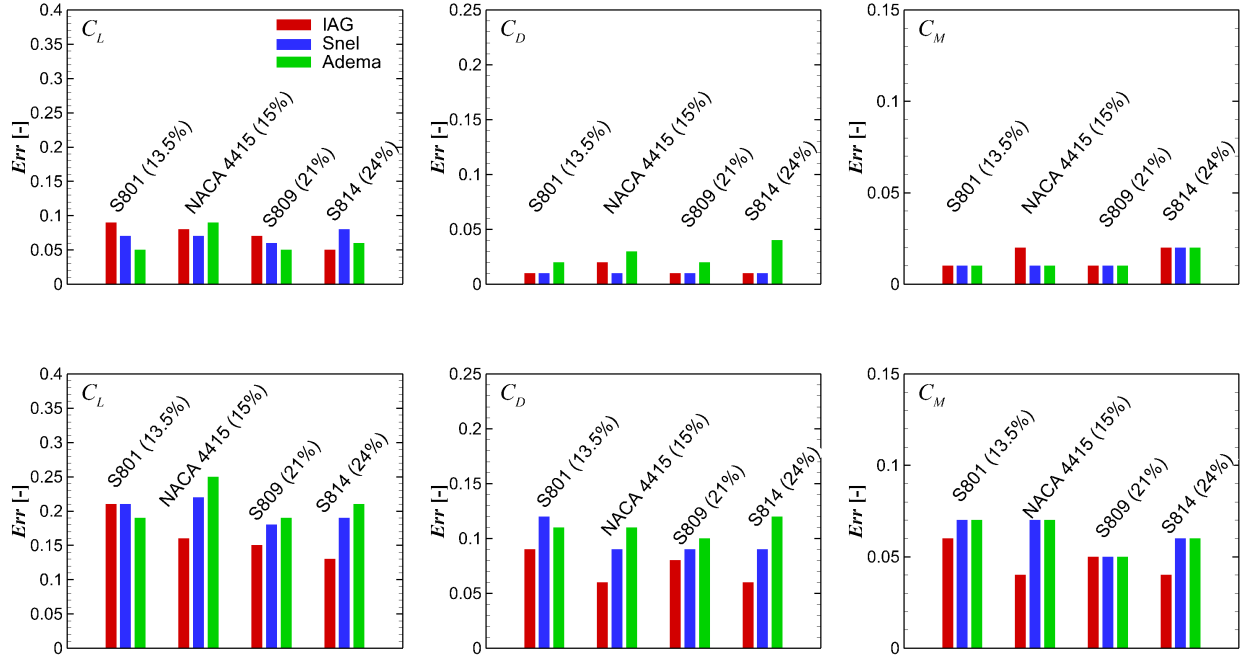

**Figure 27.** Quantified  $L_2$  norm of error with respect to the measurement data for four airfoils. Top: attached flow case ( $k = 0.073$ ,  $\bar{\alpha} = 8^\circ$ ,  $\Delta\alpha = 5.5^\circ$ ), bottom: deep stall case ( $k = 0.073$ ,  $\bar{\alpha} = 20^\circ$ ,  $\Delta\alpha = 10^\circ$ )

## 4 Conclusions

Comprehensive studies on the accuracy of several state-of-the-art dynamic models to predict the aerodynamic loads of a pitching airfoil have been conducted. From the studies, the strength and weaknesses of each model were highlighted. This information was then transferred to develop a new second order dynamic stall model proposed in this paper. The new model improves the prediction for the aerodynamic forces and their higher harmonic effects due to vortex shedding, developed for robustness to improve its usability in practical wind turbine calculations. Details on the model characteristics, modifications and treatment for numerical implementation were summarized in the present paper. The studies were conducted by examining the influence of the time step size, time signal deviation, mean angle of attack, reduced frequency, pitching amplitude and variation of the airfoil thickness. Several main conclusions can be drawn from the work.

- The general characteristics of the polar data can be predicted by all investigated dynamic stall models. Despite that, only the Adema model and the present IAG model are able to demonstrate the higher harmonic effects among the three investigated models.
- 490 – The exact time signal imposed based on the measurement campaign improves the prediction accuracy of the IAG model in comparison with the idealized sinusoidal motion.
- The dynamic forces reconstructed by the IAG model are in a sound agreement with the experimental data under various flow conditions by variation of  $\bar{\alpha}$ ,  $k$ ,  $\Delta\alpha$  and for four different airfoils by changing only the values of the critical angle of attack.
- 495 – The amplitudes at low frequency domains increase with increasing  $k$ , and can be attributed to the effects of inflow/external unsteadiness. The amplitudes at high frequency domains reduce with increasing  $k$  which are driven by flow separation effects.
- When the airfoil operates at a high  $\bar{\alpha}$  within the stall regime, a small  $\Delta\alpha$  leads to increased vibrations for lift, but contrary for the pitching moment.

500 *Author contributions.* G. Bangga developed the new model, designed the studies and conducted the analyses. T. Lutz and M. Arnold supported the research, provided suggestions and discussion about the manuscript.

*Competing interests.* The authors declare that they have no conflict of interest.

*Acknowledgements.* The authors gratefully acknowledge the Wobben Research and Development GmbH for providing the research funding through the collaborative joint work DSWind. The measurement data provided from the Ohio State University is highly appreciated.

---

|                          |                                                     |
|--------------------------|-----------------------------------------------------|
| <b>Variables</b>         |                                                     |
| $s$                      | nondimensional time                                 |
| $V$                      | incoming wind speed                                 |
| $t$                      | time                                                |
| $c$                      | chord                                               |
| $f$                      | separation factor                                   |
| $C_N$                    | normal force coefficient                            |
| $C_T$                    | tangential force coefficient                        |
| $C_L$                    | lift force coefficient                              |
| $C_D$                    | drag force coefficient                              |
| $C_M$                    | pitching moment coefficient                         |
| $C_N^P$                  | total inviscid normal force coefficient             |
| $C_N^{P1}$               | time lagged total inviscid normal force coefficient |
| $C_N^I$                  | impulsive inviscid normal force coefficient         |
| $C_N^C$                  | circulatory inviscid normal force coefficient       |
| $C_N^f$                  | viscous normal force coefficient                    |
| $C_T^f$                  | viscous tangential force coefficient                |
| $C_M^f$                  | viscous pitching moment coefficient                 |
| $C_M^C$                  | circulatory pitching moment coefficient             |
| $C_N^V$                  | vortex lift normal force coefficient                |
| $C_N^{CRIT}$             | critical normal force coefficient                   |
| $X, Y, D_n$              | deficiency functions                                |
| $M$                      | Mach number                                         |
| $K_f$                    | stiffness coefficient                               |
| $F_1$                    | first order forcing term                            |
| $F_2$                    | second order forcing term                           |
| <br><b>Greek letters</b> |                                                     |
| $\alpha$                 | angle of attack                                     |
| $\alpha_e$               | effective angle of attack                           |
| $\alpha_f$               | time lagged effective angle of attack               |
| $\alpha^{CRIT}$          | critical angle of attack                            |
| $\beta$                  | Mach number dependent parameter                     |
| $\tau_v$                 | nondimensional vortex time                          |
| $\tau$                   | time constant                                       |

---

---

**Superscripts**

|             |                         |
|-------------|-------------------------|
| <i>INV</i>  | static inviscid         |
| <i>VISC</i> | static viscous          |
| <i>I</i>    | impulsive               |
| <i>CRIT</i> | critical                |
| <i>D</i>    | dynamic loading         |
| <i>D1</i>   | first order correction  |
| <i>D2</i>   | second order correction |

**Subscripts**

|          |                            |
|----------|----------------------------|
| <i>n</i> | present sampling time      |
| <i>f</i> | viscous lagged value       |
| <i>v</i> | vortex lift affected value |

---

## 505 References

- Adema, N., Kloosterman, M., and Schepers, G.: Development of a Second Order Dynamic Stall Model, *Wind Energy Science Discussions*, 2019, 1–18, <https://doi.org/10.5194/wes-2019-87>, 2019.
- Bangga, G.: *Three-Dimensional Flow in the Root Region of Wind Turbine Rotors*, Kassel University Press GmbH, 2018.
- Beddoes, T.: Practical computation of unsteady lift, in: 8th European Rotorcraft Forum, 1982.
- 510 Carr, L. W., McAlister, K. W., and McCroskey, W. J.: Analysis of the development of dynamic stall based on oscillating airfoil experiments, Tech. rep., NASA TN D-8382, National Aeronautics and Space Administration, United States, 1977.
- Dat, R. and Tran, C.: Investigation of the stall flutter of an airfoil with a semi-empirical model of 2 D flow, ONERA, TP no. 1981-146, 1981. 11 p, 1981.
- dos Santos Pereira, R. B.: Validating the Beddoes-Leishman Dynamic Stall Model in the Horizontal Axis Wind Turbine Environment, Ph.D. thesis, 2010.
- 515 Elgammi, M. and Sant, T.: A Modified Beddoes–Leishman Model for Unsteady Aerodynamic Blade Load Computations on Wind Turbine Blades, *Journal of Solar Energy Engineering*, 138, 051 009, 2016.
- Faber, M.: A comparison of dynamic stall models and their effect on instabilities, Master’s thesis, Delft University of Technology, 2018.
- Galbraith, R.: Return from Airfoil Stall During Ramp-Down Pitching Motions, *Journal of Aircraft*, 44, 1856–1864, 2007.
- 520 Gupta, S. and Leishman, J. G.: Dynamic stall modelling of the S809 aerofoil and comparison with experiments, *Wind Energy*, 9, 521–547, 2006.
- Hansen, M. H., Gaunaa, M., and Madsen, H. A.: A Beddoes-Leishman type dynamic stall model in state-space and indicial formulations, Tech. rep., Risø-R-1354, Risø National Laboratory, Denmark, 2004.
- Hoffman, M., Ramsay, R., and Gregorek, G.: Effects of grit roughness and pitch oscillations on the NACA 4415 airfoil, Tech. rep., National Renewable Energy Lab., Golden, CO (United States), 1996.
- 525 Holierhoek, J., De Vaal, J., Van Zuijlen, A., and Bijl, H.: Comparing different dynamic stall models, *Wind Energy*, 16, 139–158, 2013.
- Janiszewska, J., Ramsay, R., Hoffman, M., and Gregorek, G.: Effects of grit roughness and pitch oscillations on the S814 airfoil, Tech. rep., National Renewable Energy Lab., Golden, CO (United States), 1996.
- Khan, M. A.: Dynamic Stall Modeling for Wind Turbines, Master’s thesis, Delft University of Technology, 2018.
- 530 Larsen, J. W., Nielsen, S. R., and Krenk, S.: Dynamic stall model for wind turbine airfoils, *Journal of Fluids and Structures*, 23, 959–982, 2007.
- Leishman, J.: Validation of approximate indicial aerodynamic functions for two-dimensional subsonic flow, *Journal of Aircraft*, 25, 914–922, 1988.
- Leishman, J. G. and Beddoes, T.: A Semi-Empirical model for dynamic stall, *Journal of the American Helicopter society*, 34, 3–17, 1989.
- 535 Martin, J., Empey, R., McCroskey, W., and Caradonna, F.: An experimental analysis of dynamic stall on an oscillating airfoil, *Journal of the American Helicopter Society*, 19, 26–32, 1974.
- McAlister, K. W., Carr, L. W., and McCroskey, W. J.: Dynamic stall experiments on the NACA 0012 airfoil, Tech. rep., NASA Technical Paper 1100, National Aeronautics and Space Administration, United States, 1978.
- Øye, S.: Dynamic stall simulated as time lag of separation, in: *Proceedings of the 4th IEA Symposium on the Aerodynamics of Wind Turbines*, Rome, Italy, 1991.
- 540 Petot, D.: Differential equation modeling of dynamic stall, *La Recherche Aérospatiale(English Edition)*, pp. 59–72, 1989.

- Ramsay, R., Hoffman, M., and Gregorek, G.: Effects of grit roughness and pitch oscillations on the S809 airfoil, Tech. rep., National Renewable Energy Lab., Golden, CO (United States), 1995.
- 545 Ramsay, R., Hoffman, M., and Gregorek, G.: Effects of grit roughness and pitch oscillations on the S801 airfoil, Tech. rep., National Renewable Energy Lab., Golden, CO (United States), 1996.
- Sheng, W., Galbraith, R. M., and Coton, F.: A new stall-onset criterion for low speed dynamic-stall, *Journal of solar energy engineering*, 128, 461–471, 2006.
- Sheng, W., Galbraith, R., and Coton, F.: A modified dynamic stall model for low Mach numbers, *Journal of Solar Energy Engineering*, 130, 2008.
- 550 Sheng, W., Galbraith, R. A. M., and Coton, F. N.: Applications of low-speed dynamic-stall model to the NREL airfoils, *Journal of Solar Energy Engineering*, 132, 2010.
- Snel, H.: Heuristic modelling of dynamic stall characteristic, in: *Proceedings of the European Wind Energy Conference*, 1997.
- Tarzanin, F.: Prediction of control loads due to blade stall, *Journal of the American Helicopter Society*, 17, 33–46, 1972.
- Tran, C. and Petot, D.: Semi-empirical model for the dynamic stall of airfoils in view of the application to the calculation of responses of a  
555 helicopter blade in forward flight, in: *6th European Rotorcraft Forum*, 1980.
- Truong, K.-V.: Modeling aerodynamics for comprehensive analysis of helicopter rotors, in: *Proceedings of 42nd European Rotorcraft Forum*, 2016.
- Truong, V.: A 2-d dynamic stall model based on a hopf bifurcation, in: *Proceedings of 19th European Rotorcraft Forum*, 1993.
- Wang, Q. and Zhao, Q.: Modification of Leishman–Beddoes model incorporating with a new trailing-edge vortex model, *Proceedings of the  
560 Institution of Mechanical Engineers, Part G: Journal of Aerospace Engineering*, 229, 1606–1615, 2015.
